# 1 **Structural asymmetry governs the assembly and GTPase activity of** 2 **McrBC restriction complexes**

3

4 Yiming Niu<sup>1,2‡</sup>, Hiroshi Suzuki<sup>2‡</sup>, Christopher J. Hosford<sup>1</sup>, Thomas Walz<sup>2\*</sup>, and Joshua S. Chappie<sup>1\*</sup>

5

6 <sup>1</sup> Department of Molecular Medicine, Cornell University, Ithaca, NY, 14853, USA

7 <sup>2</sup> Laboratory of Molecular Electron Microscopy, The Rockefeller University, New York, NY 10065, USA

8

9 \* To whom correspondence should be addressed: twalz@rockefeller.edu (T.W.), chappie@cornell.edu (J.S.C.)

10 ‡These authors contributed equally and are listed in alphabetical order.

11

12

## 13 **ABSTRACT**

14 McrBC complexes are motor-driven nucleases functioning in bacterial self-defense by cleaving  
15 foreign DNA. The GTP-specific AAA+ protein McrB powers translocation along DNA and its  
16 hydrolysis activity is stimulated by its partner nuclease McrC. Here, we report cryo-EM  
17 structures of *Thermococcus gammatolerans* McrB and McrBC, and *E. coli* McrBC. The McrB  
18 hexamers, containing the necessary catalytic machinery for basal GTP hydrolysis, are  
19 intrinsically asymmetric. This asymmetry directs McrC binding so that it engages a single active  
20 site, where it then uses an arginine/lysine-mediated hydrogen-bonding network to reposition the  
21 asparagine in the McrB signature motif for optimal catalytic function. While the two McrBC  
22 complexes use different DNA-binding domains, these contribute to the same general GTP-  
23 recognition mechanism employed by all G proteins. Asymmetry also induces distinct inter-  
24 subunit interactions around the ring, suggesting a coordinated and directional GTP-hydrolysis  
25 cycle. Our data provide novel insights into the conserved molecular mechanisms governing  
26 McrB family AAA+ motors.

## 1 INTRODUCTION

2 Infections by antibiotic-resistant bacteria pose a serious threat to human health (Resistance,  
3 2016; Solomon and Oliver, 2014). The slow progress in developing new drugs to combat these  
4 emerging 'superbugs' and the rapid exchange of resistance genes among microbial populations  
5 has intensified the need for alternative therapeutic strategies (Theuretzbacher and Piddock,  
6 2019). One such strategy employs bacteriophages (phages) – viruses that infect a bacterial  
7 host, replicate, and then induce cell lysis to release the mature phage progeny, killing the host in  
8 the process (Kortright et al., 2019). The pharmaceutical application of phages dates back to the  
9 early 1920s (Wittebole et al., 2014) and has resurged in recent years, bolstered by success in a  
10 number of clinical settings (Dedrick et al., 2019; Schooley et al., 2017). Despite these promising  
11 results, phage therapy faces numerous challenges. One significant hurdle is that bacteria have  
12 evolved an array of defense mechanisms, including restriction modification systems,  
13 modification-dependent restrictions systems (MDRS), phage-exclusion systems, and CRISPR-  
14 Cas adaptive immune systems, that can hinder phage infection and diminish their subsequent  
15 killing potential (Hille et al., 2018; Labrie et al., 2010). These machineries lack eukaryotic  
16 homologs and are conserved across antibiotic-resistant bacteria like methicillin-resistant  
17 *Staphylococcus aureus* (MRSA), *Clostridium difficile*, and *Klebsiella pneumoniae*, making their  
18 components promising candidates for targeted inhibition. Some phages indeed already encode  
19 inhibitor proteins that can neutralize restriction and/or CRISPR systems (Samson et al., 2013;  
20 Stanley and Maxwell, 2018), allowing them to survive and kill under conditions in which they  
21 would normally be suppressed. Elucidating the structure and function of bacterial defense  
22 systems will therefore extend these principles and aid in the development of new drugs that  
23 increase phage efficacy.

24 McrBC is a two-component MDRS that in *E. coli* (Ec) restricts phage DNA and foreign  
25 DNA containing methylated cytosines (Luria and Human, 1952; Weigele and Raleigh, 2016).  
26 EcMcrB consists of an N-terminal DNA-binding domain that targets fully or hemi-methylated  
27  $R^M C$  sites (where R is a purine base and  $^M C$  is a 4-methyl-, 5-methyl- or 5-hydroxymethyl-  
28 cytosine) (Gast et al., 1997; Kruger et al., 1995; Pieper et al., 1999b; Sukackaite et al., 2012;  
29 Sutherland et al., 1992; Zagorskaite et al., 2018) and a C-terminal AAA+ (extended ATPases  
30 Associated with various cellular Activities) domain that hydrolyzes GTP and oligomerizes into  
31 hexamers (Nirwan et al., 2019a; Panne et al., 2001). EcMcrB's basal GTPase activity ( $\sim 0.5$ - $1$   
32  $\text{min}^{-1}$ ) is stimulated  $\sim 30$ - $40$ -fold *in vitro* via interaction with its partner EcMcrC (Pieper et al.,  
33 1999b), a PD-(D/E)xK family endonuclease that cannot stably bind DNA on its own and thus  
34 associates with the hexameric McrB AAA+ ring (Panne et al., 2001). Biochemical data suggest

1 that stimulated GTP hydrolysis powers DNA translocation (Panne et al., 1999; Sutherland et al.,  
2 1992), allowing EcMcrBC complexes bound to distant R<sup>M</sup>C sites to interact and induce cleavage  
3 on both strands (Pieper et al., 2002; Stewart et al., 2000). While these activities have yet to be  
4 demonstrated *in vitro* for homologs beyond *E. coli*, other family members have also been shown  
5 to function in bacterial defense *in vivo* (O'Driscoll et al., 2006; O'Sullivan et al., 1995; Ohshima  
6 et al., 2002). These machines, however, exhibit different specificities for DNA modifications  
7 and/or sequences (Hosford and Chappie, 2018; O'Driscoll et al., 2006; Ohshima et al., 2002;  
8 Yang et al., 2016, Hosford et al., 2020), suggesting that the core machinery for GTP hydrolysis  
9 and DNA cleavage is conserved and has been adapted to different targets throughout evolution  
10 in response to various selective pressure from invading phages. This flexibility holds a  
11 tremendous potential for engineering new endonucleases for biotechnology and biomedical  
12 applications, providing further motivation to study the structural organization and functional  
13 regulation of McrBC complexes.

14       AAA+ proteins are large, multimeric machines that use the energy of ATP hydrolysis to  
15 power a wide array of cellular processes (Snider et al., 2008). These enzymes are built around  
16 a common structural core (Neuwald et al., 1999) and contain numerous conserved sequence  
17 elements important for nucleotide binding and hydrolysis (Erzberger and Berger, 2006). AAA+  
18 protein active sites are formed at the interface between two monomers, thus requiring higher-  
19 order assembly – predominantly as hexamers – for function (Wendler et al., 2012). As a  
20 consequence, some catalytic residues like charge-compensating arginine fingers are provided  
21 *in trans* by the neighboring subunit. Despite sharing a common architecture, McrB is the only  
22 AAA+ protein that preferentially binds and hydrolyzes GTP (Pieper et al., 1997; Pieper et al.,  
23 1999a). All McrB homologs contain a conserved consensus sequence of MNxxDRS that  
24 replaces the AAA+ sensor I motif and is predicted to function as a G4 element, which confers  
25 guanine-nucleotide specificity in GTPases (Bourne et al., 1991). Mutation of this segment,  
26 however, does not significantly alter the nucleotide-binding profile of *E. coli* McrB (Pieper et al.,  
27 1999a), indicating that other regions of the protein dictate GTP selectivity. Stimulation of  
28 hydrolysis by a binding partner is also rare among AAA+ proteins but reminiscent of the  
29 activation of small GTPases by their corresponding GTPase-activating proteins (GAPs) (Paduch  
30 et al., 2001). A key difference, however, is that McrC only exerts its effects on the assembled  
31 McrB oligomer. Elucidating the structural basis for GTP recognition and stimulated hydrolysis is  
32 important for defining McrBC's divergence from other members of both the AAA+ and GTPase  
33 superfamilies.

1           A recent cryo-EM reconstruction of the hexameric EcMcrB AAA+ domain in complex with  
2 EcMcrC (Nirwan et al., 2019b) provided the first structural view of McrBC but fell short of  
3 answering many important mechanistic questions. Here, we present cryo-EM structures of an  
4 McrB hexamer and McrBC complexes from the evolutionarily distant archaeal species  
5 *Thermococcus gammatolerans* (Tg) and the well-characterized *E. coli* system. Our models  
6 confirm that McrBC complexes share the same general architecture but lead to a different view  
7 of the GTP hydrolysis cycle wherein structural asymmetry drives the underlying physical  
8 interactions and conformational motions. Moreover, our structures provide a detailed molecular  
9 mechanism for how McrC binding stimulates McrB GTP hydrolysis, which we show is conserved  
10 across the McrBC family. Our structures also establish that McrB homologs use the same  
11 general chemistry employed by all GTPases to recognize GTP, albeit through different structural  
12 elements upstream of the AAA+ domain. This observation establishes how distant McrB  
13 homologs have adapted and maintained guanine-nucleotide specificity despite the individual  
14 constraints imposed by their structurally unrelated N-terminal domains. Together these data  
15 provide novel insights into the structure, function, and regulation of motor-driven McrBC  
16 nucleases.

17

## 18 **RESULTS**

### 19 **TgMcrB<sup>AAA</sup> forms an asymmetric hexamer**

20 Given the widespread distribution of *mcrBC* genes among diverse bacteria and archaea, we  
21 sought to examine the structural and biochemical properties of different McrB homologs to  
22 understand how these AAA+ enzymes have evolved to preferentially bind and hydrolyze GTP.  
23 Our previous work identified the archaeal McrB homolog from *Thermococcus gammatolerans*  
24 (TgMcrB) as an ideal candidate for structural studies given its compact size and increased  
25 thermostability (Hosford et al., 2020). The purified AAA+ domain from TgMcrB (TgMcrB<sup>AAA</sup>)  
26 forms stable oligomers even in the absence of nucleotides (Figure S1a). Single-particle cryo-EM  
27 analysis of purified TgMcrB<sup>AAA</sup> incubated with the non-hydrolyzable GTP analog GTPγS yielded  
28 a density map at an overall resolution of 3.1 Å with no symmetry imposed (Figures 1 and S1).  
29 The cryo-EM map reveals that TgMcrB<sup>AAA</sup> forms a ring-shaped, homohexameric assembly with  
30 six nucleotides bound at the subunit interfaces, similar to the closed-ring assembly seen in Type  
31 I AAA ATPases (Gai et al., 2004; Monroe et al., 2017). Each subunit displays a canonical AAA+  
32 fold with the additional features of a β-hairpin inserted in helix 2 of the large subdomain as  
33 previously predicted (Iyer et al., 2004) and ‘wing’-like helices in the small subdomain  
34 (Supplementary Data S1 and S2). The TgMcrB<sup>AAA</sup> hexamer is asymmetric with four tight

1 interfaces (between monomers B/C, C/D, D/E, and E/F) that bury a surface area ranging from  
2 2393 to 2554 Å<sup>2</sup> and two loose interfaces (between monomers A/B and F/A) that bury surface  
3 areas of 1519 and 1772 Å<sup>2</sup> (Figure 1c). Tight interfaces feature a hydrogen bond between  
4 Asp420 in one monomer and Arg360 in the adjacent monomer (Figure 1d). Arg414 from the first  
5 monomer also extends into the neighboring monomer, where it forms hydrogen bonds with  
6 Glu527 and π-stacking interactions with Tyr530 (Figure 1d). These interactions are absent at  
7 the loose interfaces, where Glu527 instead interacts *in trans* with Arg424 (Figure 1e). All of  
8 these residues are highly conserved amongst McrB family proteins (Supplementary Data S1).

9 To determine if these interface residues affect McrB's catalytic turnover, we mutated  
10 each side chain individually to alanine in the context of TgMcrB<sup>AAA</sup> and measured basal GTPase  
11 activity using a colorimetric assay. All mutants show an approximate two-fold increase in  
12 hydrolysis activity compared to that of the wild-type protein (Figure S1i). Alanine substitution of  
13 Arg337 in EcMcrB (corresponding to Arg414 in TgMcrB, Supplementary Data S2) was  
14 previously shown to increase the basal GTPase rate three-fold (Pieper et al., 1999a), consistent  
15 with our results.

16 In parallel, we also determined the structure of TgMcrB<sup>AAA</sup> in the presence of GTPγS by  
17 X-ray crystallography at 2.95-Å resolution (Supplementary Table S1). Symmetry-related  
18 hexamers abut against each other in the crystal lattice, deforming the planar arrangement of the  
19 six subunits in each molecule. This produces an 'open-ring' conformation with the subunits at  
20 one interface significantly splayed apart and the small subdomain of the A subunit highly  
21 disordered (Figure S1j). The individual TgMcrB<sup>AAA</sup> monomers, however, adopt the same overall  
22 conformation and organization of nucleotide binding as is observed in the cryo-EM  
23 reconstruction (Figure S1k), suggesting the distorted appearance of the hexamer is an artifact of  
24 crystal-packing forces that strain the loose interfaces.

25

## 26 **TgMcrB<sup>AAA</sup> contains the complete machinery for nucleotide hydrolysis**

27 Nucleotide hydrolases harness the energy of ATP or GTP hydrolysis to catalyze energetically  
28 unfavorable biological reactions, coordinate signal-transduction events, and power protein  
29 conformational changes that orchestrate a multitude of cellular processes (Vetter and  
30 Wittinghofer, 1999). Efficient hydrolysis requires (i) the binding and recognition of the  
31 appropriate nucleotide substrate, (ii) the correct positioning of a water molecule for an in-line  
32 SN2 attack on the γ-phosphate to initiate cleavage of the phosphoanhydride bond, and (iii)  
33 neutralization of a negative charge that develops between the β- and γ-phosphates in the  
34 transition state (Chappie and Dyda, 2013).

1           While a conserved sequence motif of GxxGxGK[T/S] (P-loop/Walker A motif)  
2 coordinates the  $\alpha$ - and  $\beta$ -phosphates in both ATPases and GTPases (Wittinghofer, 2016), the  
3 remaining catalytic machinery, specificity determinants, and charge-compensating elements  
4 vary from enzyme to enzyme. AAA+ proteins contain four additional sequence motifs – Walker  
5 B, Sensor I, Sensor II, and second region of homology (SRH) – that contribute to ATP binding  
6 and hydrolysis along with the conserved P-loop/Walker A motif (Erzberger and Berger, 2006;  
7 Miller and Enemark, 2016). The Walker B motif (D[D/E]xx) stabilizes an essential magnesium  
8 cofactor and acts in concert with a polar residue in the Sensor I motif to orient the catalytic water  
9 for nucleophilic attack on the  $\gamma$ -phosphate. The Sensor II motif localizes to helix 7 and contains  
10 a conserved arginine that interacts with the  $\gamma$ -phosphate. By convention, the subunit contributing  
11 these structural motifs to the nucleotide-binding pocket is referred to as the *cis* subunit. The  
12 neighboring, *trans* subunit inserts the arginine finger at the end of helix 4 of the SRH into the  
13 nucleotide-binding pocket, where it stabilizes the  $\gamma$ -phosphate and contributes to the charge  
14 compensation in the transition state.

15           Each composite active site of TgMcrB<sup>AAA</sup> contains one GTP $\gamma$ S molecule and a bound  
16 magnesium ion (Figure 2a-c). In the *cis* subunit, the main-chain atoms of the Walker A motif  
17 interact with the  $\alpha$ - and  $\beta$ -phosphates and Lys221 contacts the  $\gamma$ -phosphate of GTP $\gamma$ S (Figure  
18 2a-b). Thr222 (Walker A) and Asp356 (Walker B) coordinate the magnesium cofactor along with  
19 two ordered water molecules (Figure 2a). Mutation of these conserved side chains to alanine  
20 impairs the basal GTPase activity of TgMcrB<sup>AAA</sup> (Figure 2c-d). Glu537 (Walker B) lies in close  
21 proximity to the  $\gamma$ -phosphate, primed to help stabilize a catalytic water (Figure 2a). An alanine  
22 substitution at this position completely abolishes hydrolysis activity (Figure 2d). Negative-stain  
23 EM indicates that the Asp356Ala mutation has a higher propensity to disrupt the TgMcrB<sup>AAA</sup>  
24 hexamer than the Glu357Ala mutation (Figure 2e), consistent with their distinct functions in  
25 nucleotide binding/stabilization versus catalysis. This result mirrors the different effects on  
26 oligomerization observed when the corresponding residues (Asp279 and Glu280) were mutated  
27 in EcMcrB (Nirwan et al., 2019a). Notably, the conserved McrB consensus loop (<sup>409</sup>MNxxDR<sup>414</sup>)  
28 replaces Sensor I and is located close to the  $\gamma$ -phosphate (Figure 2 and Supplementary Data  
29 S1). Asn410Ala and Asp413Ala mutants significantly impair basal GTPase activity (Figure 2d),  
30 suggesting they are critical for catalytic turnover, rather than for nucleotide binding as was  
31 previously predicted (Pieper et al., 1997).

32           His501 and Trp223 in the *cis* subunit sandwich the guanine base of GTP $\gamma$ S (Figure 2a).  
33 His501 is situated above and forms a hydrogen bond with the 7' nitrogen. Trp223, which lies  
34 adjacent to the Walker A motif, forms a unique parallel  $\pi$ -stacking interaction from below that

1 has never been observed nor predicted for any GTPase or AAA+ protein (Iyer et al., 2004;  
2 Leipe et al., 2002). Mutation of Trp223 to Ala completely abolishes the basal GTPase activity  
3 (Figure 2d) and causes the protein to aggregate, as seen by negative-stain EM imaging (Figure  
4 2e). These observations indicate that  $\pi$ -stacking is critical for both McrB GTP binding and the  
5 stability of the oligomeric assembly. Interestingly, the analogous residue (Phe209) was never  
6 mutated in previous studies of EcMcrB as it is not strictly conserved across the McrB family. We  
7 do note, however, that every homolog contains a residue at this position that is capable of  $\pi$ -  
8 stacking (Trp, Phe, Tyr or Arg) (Figure 2c and Supplementary Data S1).

9         The *trans* subunit also contributes numerous conserved side chains that stabilize  
10 different portions of the bound nucleotide. Asp377 interacts with the 3' ribose hydroxyl group  
11 while Glu375 and Lys378 coordinate the  $\alpha$ -phosphate (Figure 2b and Supplementary Data S1).  
12 Mutations of these side chains had negligible effects on basal GTPase activity (Figure 2d).  
13 Arg426 in helix  $\alpha$ 11 acts as the charge-compensating arginine finger, here forming hydrogen  
14 bonds with the  $\gamma$ -phosphate in the ground state (Figure 2b). A second neighboring arginine  
15 located on the same helix, Arg425, assumes the role of the missing Sensor II motif (Figure 2b  
16 and c). Arg425Ala and Arg426Ala mutations impair basal GTPase activity and disrupt hexamer  
17 formation (Figure 2d and e). All the *trans* interactions with GTP $\gamma$ S are prominent at the tight  
18 interfaces but are lost at the loose interfaces. Since the cryo-EM density for the Arg side chains  
19 in the Sensor II/Arginine finger motif are also weaker at the loose interfaces (Figure S1k), the  
20 GTP-binding sites at these locations are likely in a non-catalytic state. Taken together, these  
21 results indicate that TgMcrB<sup>AAA</sup> possesses all the critical residues needed to bind and hydrolyze  
22 GTP.

23

#### 24 **TgMcrB and TgMcrC form an asymmetric complex**

25 We next sought to elucidate structural and biochemical consequences of TgMcrC binding to  
26 TgMcrB. Purified TgMcrC was very sensitive to buffer conditions and could only be  
27 concentrated in the presence of TgMcrB. Together full-length TgMcrB and TgMcrC formed  
28 stable, dumbbell-shaped complexes in the presence of GTP $\gamma$ S that were suitable for structure  
29 determination by cryo-EM (Figure S2a). Initial image processing showed that the complex  
30 consists of two TgMcrB hexamers connected through TgMcrC dimerization (Figure S2b).  
31 Because of structural variability, however, we were only able to refine a 'half'-complex (Figure  
32 S2c), which yielded a map at an overall resolution of 2.4 Å (Figures 3 and S2d-g). In this  
33 reconstruction, a single TgMcrC binds the TgMcrB hexamer by inserting itself through the  
34 central pore of the AAA+ ring in an asymmetric fashion (Figure 3a-c).

1           The resolution of our reconstruction allowed us to build the TgMcrC structure *de novo*.  
2 Each monomer contains a scaffold domain, a ‘finger domain’ and a C-terminal endonuclease  
3 domain (Figure 3d, Supplementary Data S3). The scaffold domain (residues 1-98 and 289-298)  
4 consists of a barrel-like structure that centrally positions the two flanking domains, forming a  
5 rigid connection between the finger and endonuclease domains. The finger domain (residues  
6 99-288) adopts an extended, segmented structure with two antiparallel helices that contact the  
7 nuclease domain above, a helical bundle, and a long  $\beta$ -sheet ‘stalk’ that protrudes downward,  
8 terminating in a loop-helix-loop region at the tip (Figures 3d and S3a). The C-terminal  
9 endonuclease domain (residues 299-458) rests atop the structure and though poorly resolved in  
10 our map exhibits a fold characteristic of PD-(D/E)xK family enzymes.

11           The finger domain spans the entire length of the hexamer and its binding interface  
12 changes along the axis of the central pore (Figure S3a-e). At the top of the ring, the helical  
13 bundle associates with the F and E subunits and then tilts to contact the E and D subunits near  
14 the middle of the assembly (Figures 3c and S3a-c). We also observe interactions between the  
15  $\beta$ -sheet stalk and the E subunit at this midpoint (Figure S3a and d). The loop-helix-loop at the  
16 distal tip of the finger domain plugs a narrow opening at the very bottom of the McrB hexamer  
17 (Figures 3a, S3a and e, Supplementary Data S3). Conserved aromatic residues Phe260 and  
18 Tyr272 from the helix 2 inserts of each McrB subunit surround and stabilize the tip (Figure 3e  
19 and Supplementary Data S1). While the finger domain interacts with all six subunits of TgMcrB  
20 at the bottom of the hexamer, TgMcrC binds the hexamer in a highly asymmetric fashion.

21           TgMcrC binding breaks the parallel  $\pi$ -stacking interaction between Arg414<sup>F</sup> and Tyr530<sup>E</sup>  
22 at the E/F interface (Figure 3c and f), which has the smallest interaction area among the four  
23 tight interfaces ( $\sim 2400 \text{ \AA}^2$  versus  $>2500 \text{ \AA}^2$  for all the others). This perturbation changes the  
24 conformation of the 414-420 loop in subunit F as Arg414<sup>F</sup> rotates to hydrogen bond with the  
25 main-chain atoms of Leu241<sup>McrC</sup> and Phe242<sup>McrC</sup> (Figures 3f and S3h-i). Concomitantly, Tyr530  
26 and Asn531 in subunit E hydrogen bond to Asp494 in subunit F. Glu238 in the finger domain  
27 further stabilizes this conformation through an additional hydrogen bond with Asp494<sup>F</sup>. TgMcrC  
28 binding also generates some additional interactions in the F/A interface, where His250<sup>McrC</sup>  
29 hydrogen bonds with Tyr530<sup>McrB</sup> from the A subunit and Met240<sup>McrC</sup> and Leu241<sup>McrC</sup> form van  
30 der Waals interactions with Tyr530<sup>McrB</sup> in the F subunit (Figure 3f, Supplementary Data S3).  
31 These interactions, which bury a combined surface area of  $1298 \text{ \AA}^2$ , serve to anchor McrC at  
32 the top of the ring, restricting its motion and orientation. Despite the localized differences at the  
33 E/F interface, the conformation of the TgMcrB hexamer remains largely unchanged in the  
34 TgMcrBC complex (overall RMSD of  $0.75 \text{ \AA}$  compared to TgMcrB<sup>AAA</sup> alone), with its intrinsic



1 asymmetry and the remaining tight and loose interface interactions preserved (Figures 3c, S3f  
2 and g). These findings indicate that TgMcrC does not induce substantial remodeling of the  
3 TgMcrB hexamer but instead adapts and exploits its intrinsic asymmetry when binding.  
4

### 5 **TgMcrC binding optimally positions existing catalytic machinery to stimulate GTP** 6 **hydrolysis**

7 A distinguishing feature of the *E. coli* McrBC system is the ability of McrC to stimulate McrB's  
8 GTP hydrolysis *in vitro* (Pieper et al., 1997; Pieper et al., 1999a). Purified TgMcrC similarly  
9 stimulates TgMcrB's basal GTPase activity, demonstrating that this is also a conserved property  
10 of other homologs (Figure 4d). Our high-resolution TgMcrBC structure reveals the underlying  
11 molecular mechanism governing this stimulation. As a consequence of the structural asymmetry  
12 imposed by the TgMcrB hexamer, TgMcrC's finger domain engages only a single active site at a  
13 time (Figure 4a). Here, the helical bundle wedges against the D/E interface and inserts a highly  
14 conserved arginine (Arg263<sup>McrC</sup>) at the edge of the pocket (Figures 4b-c, S3a and c). Acting  
15 through a hydrogen-bonding network that includes Asn359<sup>McrB</sup>, Asn410<sup>McrB</sup>, Asp413<sup>McrB</sup>, and a  
16 bridging water (H<sub>2</sub>O<sup>Bridging</sup>), Arg263<sup>McrC</sup> ultimately alters the conformation of the McrB consensus  
17 loop. This reorganization allows Asn410 and E357 of the Walker B motif to position a second  
18 water (H<sub>2</sub>O<sup>Catalytic</sup>) that is poised for nucleophilic attack on the  $\gamma$ -phosphate (Figure 4b). Glu357  
19 also acts in concert with the Asp356 of the Walker B motif to stabilize a third water molecule that  
20 completes the octahedral coordination of the magnesium cofactor (Figure 4b).

21 Alanine substitutions at Asn410 and Asp413 in full-length TgMcrB abolish both basal  
22 and McrC-stimulated GTPase activity (Figure 4d), underscoring their crucial catalytic function.  
23 Mutation of Arg263<sup>McrC</sup> to alanine selectively abrogates the stimulatory effect of McrC binding  
24 without impairing basal turnover (Figure 4d). The apparent GAP function thus arises from an  
25 indirect reconfiguration of the side chains that orient the catalytic water rather than promoting  
26 charge compensation in the transitions state.  
27

### 28 **Sequential rearrangements of the consensus loop control the cycle of McrB GTP** 29 **hydrolysis**

30 The consensus loop and charge-compensating arginine finger (Arg426<sub>trans</sub>) adopt different  
31 conformations at each of the six interfaces within the McrC-bound TgMcrB hexamer (Figure 4e-  
32 j). As described above, the tight D/E interface shows an McrC-activated conformation with  
33 Arg426<sub>trans</sub> stabilizing the  $\gamma$ -phosphate and Asn410 properly arranged to orient the catalytic  
34 water (Figure 4b and e). In the adjacent tight E/F interface, Asn410 and Arg426<sub>trans</sub> appear in

1 close contact with the  $\gamma$ -phosphate of GTP $\gamma$ S in a manner that excludes a potential catalytic  
2 water (Figure 4f). The loose F/A interface uniquely contains GDP with the side-chain oxygen of  
3 Asn410 forming a hydrogen bond with the  $\beta$ -phosphate. This partially occludes the space  
4 normally occupied by the  $\gamma$ -phosphate and forces Arg426<sub>trans</sub> into a conformation in which it is  
5 angled away from the nucleotide (Figure 4g). At the loose A/B interface, Arg426<sub>trans</sub> and Asn410  
6 both point away from GTP $\gamma$ S, likely a consequence of the weakened inter-subunit interactions  
7 (Figure 4h). In both the tight B/C and C/D interfaces, Arg426<sub>trans</sub> interacts with the  $\gamma$ -phosphate  
8 but Asn410 faces away from the nucleotide (Figure 4i and j). These pockets appear primed for  
9 hydrolysis but unable to proceed efficiently as Asp413 adopts random orientations in the  
10 absence of McrC and thus cannot help stably redirect Asn410 to position the catalytic water  
11 (Figure 4i and j).

12 These conformational differences likely reflect different states in the hydrolysis cycle,  
13 with the B/C and C/D active sites occupying a GTP-bound, pre-hydrolysis state, D/E most likely  
14 the activated transition state, E/F assuming a post-hydrolysis state, and the loose GDP-bound  
15 F/A and GTP $\gamma$ S-bound A/B sites depicting the phosphate release and subsequent nucleotide  
16 exchange steps, respectively. Together these data imply that TgMcrB GTP hydrolysis proceeds  
17 through a coordinated, sequential mechanism.

18

### 19 **McrBC homologs share a conserved architecture and catalytic mechanism**

20 To establish whether different homologs use a conserved mechanism for stimulated hydrolysis,  
21 we determined the single-particle cryo-EM structure of the complex formed by the full-length *E.*  
22 *coli* proteins in the presence of GTP $\gamma$ S. EcMcrBC also formed dumbbell-shaped particles and  
23 we refined a 'half-map reconstruction of these assemblies to an overall resolution of 3.3 Å  
24 (Figures 5 and S4). As with TgMcrBC, a single EcMcrC monomer inserts into the central pore of  
25 the EcMcrB hexamer (Figure 5a and b). A cross-section slice through the map at the height of  
26 the bound nucleotides reveals that the same intrinsic asymmetry is present, with loose F/A and  
27 A/B interfaces and tight B/C, C/D, D/E and E/F interfaces (Figure 5c). The unique interactions  
28 stabilizing each tight interface are also conserved in EcMcrBC and absent in the loose  
29 interfaces: Arg337 (Arg414 in TgMcrB) and Asp343 (Asp420 in TgMcrB) interact *in trans* with  
30 Phe428 (Tyr530 in TgMcrB) and Arg283 (Arg360 in TgMcrB), respectively (Figure S5a and b).  
31 In contrast to the TgMcrBC structure, we observe unambiguous density for GDP in the A and F  
32 monomers of the EcMcrB hexamer (Figure 5c).

33 EcMcrC shares the same general architecture as TgMcrC, featuring an extended finger  
34 domain and a C-terminal nuclease domain. EcMcrC, however, lacks the N-terminal portion of

1 the scaffold domain, retaining only a small  $\beta$ -hairpin insertion between the finger and nuclease  
2 domains (Figures 3d and S5e). Sequence alignment of McrC family proteins suggests that  
3 these insertion strands serve as a conserved linker between the finger and nuclease domains  
4 (Supplementary Data S3). The finger domains superimpose with an RMSD of 2.4 Å, confirming  
5 the overall structural conservation between these evolutionarily remote homologs.

6 The structural asymmetry present in the EcMcrBC complex similarly biases EcMcrC to  
7 associate with only a single active site at a time (Figure 5c and d). EcMcrC inserts Lys157 into  
8 the D/E interface of the EcMcrB hexamer and employs the same hydrogen-bonding network  
9 seen in the TgMcrBC complex to reorient Asn333 and Asp336 in the McrB signature motif  
10 (Figure 5e). Asn282 spatially occupies the same position as Asn359 in TgMcrB (Figures 4b and  
11 5e). Although we do not resolve the catalytic or bridging waters in our structure of the *E. coli*  
12 complex, the location of this side chain suggests a conserved mechanistic function. The rest of  
13 the catalytic machinery is also conserved (Figures 5e, S5c and d).

14 Our structural findings rationalize previous phenotypes associated with consensus loop  
15 mutants in EcMcrB. Asn333Ala and Asp336Asn substitutions would disrupt the hydrogen-  
16 bonding network needed to position the catalytic water, leading to a complete loss of GTPase  
17 activity and the abrogation of long-range DNA cleavage (Pieper et al., 1997; Pieper et al.,  
18 1999a). Loss of stimulated GTPase activity due to an alanine mutation at Asn282 would arise  
19 from a similar structural perturbation (Pieper et al., 1999a). Interestingly, substituting a lysine for  
20 TgMcrC's catalytic Arg263 partially restores the stimulatory effect that is lost when this side  
21 chain is replaced with alanine (Figure 4d). Together these data demonstrate that stimulated  
22 GTP hydrolysis in different McrBC homologs occurs via a conserved molecular mechanism.

23

## 24 **Divergent McrB homologs employ the same generalized principles for nucleotide** 25 **specificity**

26 In every GTPase, the conserved sequence [N/T] [K/Q]xD (termed the 'G4 element') confers  
27 nucleotide specificity (Bourne et al., 1991; Leipe et al., 2002; Paduch et al., 2001). The  
28 absolutely conserved aspartate side chain in this motif forms specific hydrogen bonds with the  
29 1' amine and 2' amino group of the guanine base, thereby distinguishing it from ATP (Figure 5f).  
30 Nothing in the TgMcrB AAA+ domain makes contact with this portion of the nucleotide (Figure  
31 2a and b), suggesting other structural features fulfill this role. Our reconstructions of the full-  
32 length EcMcrBC and TgMcrBC complexes reveal how each individually achieves this end  
33 (Figure 5g and h). In EcMcrBC, a loop that lies directly upstream of the AAA+ domain  
34 coordinates the guanine base through main-chain interactions (Figure 5g). The backbone

1 carbonyl of Leu177 hydrogen bonds with both the 1' amine and 2' amino group of the guanine  
2 base, while the main chain nitrogen of Phe178 reads out the 6' carbonyl group. Collectively  
3 these interactions would discriminate against the substitution of an amino group at the 6'  
4 position (as in ATP and XTP) and the absence of an amino group at the 2' position (as in ATP  
5 and ITP), consistent with EcMcrB's nucleotide selectivity preferences of GTP>ITP >XTP>>ATP  
6 (Pieper et al., 1999a). TgMcrB, in contrast, specifically coordinates the guanine base through  
7 two water-mediated interactions (Figure 5h). Asn193 at the very beginning of the AAA+ domain  
8 directly hydrogen bonds to guanine's 6' carbonyl and orients a water molecule to interact with  
9 the 1' amine and 2' amino group. The backbone carbonyl of Thr219 also interacts with the 6'  
10 carbonyl group of the base via a second bridging water. Importantly, the fundamental chemistry  
11 underlying guanine nucleotide recognition is conserved between both homologs despite each  
12 utilizing different structural elements.

13

#### 14 **McrBC forms a tetradecameric assembly through the dimerization of McrC**

15 Previous studies reported that EcMcrBC complexes form tetradecameric assemblies *in vitro*  
16 (Nirwan et al., 2019a; Panne et al., 2001). In our hands, dimeric McrBC complexes generated  
17 using the full-length Tg and Ec proteins exhibit a high degree of conformational variability, which  
18 prevented us from calculating interpretable maps for these larger oligomeric states and limited  
19 our ability to analyze the dimer interface between the two McrC subunits. To overcome this  
20 limitation, we produced complexes containing full-length TgMcrC bound to the AAA+ domain of  
21 TgMcrB (TgMcrB<sup>AAA</sup>C) in the presence of GTPγS. This assembly was structurally more  
22 homogeneous and allowed us to calculate maps of the 'half-complex' at 3.7-Å resolution as well  
23 as a C2-symmetrized map of the entire TgMcrB<sup>AAA</sup>C tetradecameric complex at 4.2-Å resolution  
24 (Figure S6). A TgMcrC dimer bridges two TgMcrB<sup>AAA</sup> hexamers in this structure (Figure 6a), with  
25 the scaffold and nuclease domains forming the dimer interface (Figure 6b). The nuclease  
26 domains associate through their α12 helices and a loop between the β10 and β11 strands ('L'),  
27 whereas the neighboring scaffold domains interact with each other through their β4 strands that  
28 form main-chain hydrogen bonds with each other. While we could not calculate a reconstruction  
29 for the full EcMcrBC tetradecameric assembly, the map for the half-complex contains density for  
30 an additional ordered nuclease domain of EcMcrC (Figure S5f). The organization of the EcMcrC  
31 nuclease domains at the dimer interface is identical to that seen in the TgMcrC dimer, with the  
32 α10 helix and an analogous extended loop serving as the primary points of contact (Figure  
33 S7a).

34

## 1 **The McrC dimer adopts a cleavage-incompetent conformation in the absence of a DNA** 2 **substrate**

3 The DNA-bound structures of other PD-(D/E)xK nucleases provide a template for modeling  
4 McrC's cleavage activity. Of the many structural homologs identified by the DALI server (Holm  
5 and Rosenstrom, 2010), the coordinates of the *Thermococcus kodakarensis* EndoMS  
6 endonuclease (PDB: 5GKF; Z-score 7.9; Nakae et al., 2016) provided the best framework for  
7 these purposes. EndoMS binds DNA as a dimer, with each active site attacking a single strand  
8 of the DNA duplex to induce a double-strand break. As with other PD-(D/E)xK enzymes,  
9 Asp165<sup>EndoMS</sup>, Glu179<sup>EndoMS</sup> and Lys181<sup>EndoMS</sup> coordinate a divalent metal cofactor that is  
10 required for catalytic function (Knizewski et al., 2007; Nakae et al., 2016). Structural  
11 superposition confirms TgMcrC's C terminus shares the same fold and identifies Asp340<sup>TgMcrC</sup>,  
12 Asp354<sup>TgMcrC</sup> and Lys356<sup>TgMcrC</sup> as putative catalytic side chains based on their spatial alignment  
13 with the EndoMS metal-binding residues (Figure 6c). EcMcrC also shares this structural  
14 homology (Figure S7b). Importantly, our modeling is consistent with previous biochemical data  
15 showing that mutation of the predicted catalytic residues in EcMcrC (Asp224<sup>EcMcrC</sup>, Asp257<sup>EcMcrC</sup>  
16 and Lys259<sup>EcMcrC</sup>) impairs cleavage of modified DNA *in vitro* (Pieper and Pingoud, 2002). Further  
17 comparison shows that the organization and location of the active sites in the TgMcrC and  
18 EcMcrC dimers is conserved between the two species (Figure S7c).

19 To gain insight into McrC cleavage, we overlaid two copies of the TgMcrC and EcMcrC  
20 endonuclease domains independently onto the dimeric, DNA-bound EndoMS complex (Figures  
21 6d and S7d). The nuclease domains align in an orientation that resembles the dimer  
22 configuration captured in our cryo-EM structures; however, we observe numerous steric clashes  
23 in both models. TgMcrC's scaffold domain and the  $\alpha$ 12 nuclease helices collide with the DNA  
24 substrate (Figure 6e). EcMcrC lacks an N-terminal scaffold domain yet still clashes with the  
25 DNA backbone, owing to the first helix of its nuclease domain being significantly longer (Figure  
26 S7e). Attempts to model similar interactions with other structurally related homologs like EcoRV  
27 (PDB: 1AZ0; Perona and Martin, 1997) and the *Sulfolobus solfataricus* Holliday junction  
28 endonuclease (PDB: 1OB8; Middleton et al., 2004) resulted in substantial clashes between the  
29 two McrB hexamers. We therefore speculate that our dimeric McrBC structures depict a  
30 conformation that is incompatible with DNA cleavage and that a major conformational change  
31 would be required for nuclease activity to proceed unencumbered.

## 32 **DISCUSSION**

1 Our structural analysis reveals that TgMcrB<sup>AAA</sup> forms an asymmetric hexamer, similar to the  
2 architecture adopted by many other AAA+ family proteins (de la Pena et al., 2018; Enemark and  
3 Joshua-Tor, 2006; Gates et al., 2017; Puchades et al., 2017; Ripstein et al., 2017; Twomey et  
4 al., 2019; Zehr et al., 2017; Zhao et al., 2015). Asymmetry appears to be maintained by the  
5 conformation of key interface residues – Arg360, Glu527 and Tyr530 in one monomer and  
6 Arg414, Asp420 and Arg424 in its neighbor – acting *in trans*. Alanine substitutions of these  
7 residues increase basal GTPase activity by ~two-fold (Figure S1i), suggesting they help restrict  
8 uncoordinated, random GTP hydrolysis throughout the hexamer. The asymmetry in the ring also  
9 explains how crystal packing forces could distort the hexamer at the two loose interfaces  
10 leading to the open ring conformation observed in our TgMcrB<sup>AAA</sup> X-ray structure (Figure S1j).  
11 These observations argue that asymmetry is an intrinsic characteristic of the McrB<sup>AAA</sup> hexamer  
12 rather than being induced upon McrC binding as has recently been proposed (Nirwan et al.,  
13 2019b).

14 The TgMcrB AAA+ domain possesses all the catalytic machinery needed for nucleotide  
15 hydrolysis. We find that the canonical *cis*-acting Sensor II arginine is replaced with a *trans*-  
16 acting arginine (Arg425) that is positioned adjacent to the charge-compensating arginine finger  
17 (Arg426) in helix  $\alpha$ 11 (Figure 2b). Our cryo-EM and X-ray structures of TgMcrB<sup>AAA</sup> reveal that  
18 Arg425 is not only important for stabilizing Glu375 *in cis* as predicted from the previous  
19 structures of *E. coli* complexes (Nirwan et al., 2019b) but also interacts with the phosphates of  
20 GTP *in trans* (Figure 2b). Asn410 (consensus loop) and Glu357 (Walker B motif) together  
21 position the catalytic water. We note that Trp223 forms a crucial  $\pi$ -stacking interaction with the  
22 guanine base that is also present in EcMcrB and functionally conserved at the sequence level in  
23 other homologs. Perturbing any of these side chains reduces basal GTP hydrolysis of  
24 TgMcrB<sup>AAA</sup>. Similar phenotypes were observed with the corresponding mutations in the *E. coli*  
25 protein (Pieper et al., 1999a), indicating that the basic catalytic machinery is hardwired into the  
26 McrB AAA+ fold across evolution.

27 We demonstrate that McrC-stimulated GTP hydrolysis is a broadly conserved property of  
28 the McrBC family and not simply a unique feature of the *E. coli* homolog (Figure 4d) (Pieper et  
29 al., 1997; Pieper et al., 1999a). While this type of stimulation is uncommon among AAA+  
30 proteins, it resembles the activation of small G proteins by their cognate GAPs. GAPs enhance  
31 catalytic turnover either by contributing essential catalytic residues *in trans* or by  
32 conformationally stabilizing and/or reorienting active-site elements into an optimal configuration  
33 (Bos et al., 2007). In nearly every case, these interactions affect the charge-compensating  
34 element (Mishra and Lambright, 2016). RasGAP, for example, provides the arginine finger

1 needed for Ras turnover while RGS4 binding to  $G_{i\alpha 1}$  reorients an existing arginine in the switch I  
2 motif (Scheffzek et al., 1997; Tesmer et al., 1997). A notable exception is RapGAP, which  
3 provides *in trans* an asparagine that positions the nucleophilic water (Scrima et al., 2008). Our  
4 structures show that TgMcrC and EcMcrC stimulate hydrolysis indirectly by altering the  
5 conformation of the McrB consensus loop. Both proteins insert a conserved basic residue  
6 (Arg263<sup>TgMcrC</sup> and Lys157<sup>EcMcrC</sup>) at the edge of the McrB active site (Figure 4c) and, via a  
7 hydrogen-bonding network, reposition a conserved asparagine (Asn410<sup>TgMcrB</sup> and Asn333<sup>EcMcrB</sup>)  
8 that in turn correctly orients the catalytic water for nucleophilic attack on the  $\gamma$ -phosphate  
9 (Figures 4b and 5e). This conserved molecular mechanism thus represents a unique variation  
10 on a common theme. We note that the helical bundle of the McrC finger domain wedges into the  
11 E/F interface at the top of the McrB hexamer in both structures (Figure 3f). This interaction not  
12 only anchors McrC but also directs its catalytic machinery to the adjacent active site at the D/E  
13 interface (Figures 4b and S3c). These constraints dictate that McrC stimulation can only occur  
14 at a single active site at any given time.

15 In our structures, the consensus loop and the *in trans* arginine finger adopt different  
16 conformations in each active site around the McrB hexamer (Figures 4e-j). We interpret each  
17 configuration as representing a different state in the hydrolysis cycle (Figure 7, dashed red  
18 outline). The McrC-engaged D/E active site assumes a transition state-like conformation with  
19 the catalytic machinery optimally positioned for simulated turnover. In the tight C/D and B/C  
20 active sites, GTP is bound but the catalytic components are in a suboptimal conformation. This  
21 configuration suggests a pre-hydrolysis state that is primed for interaction with McrC. The loose  
22 A/B and F/A sites represent low-affinity, post-hydrolysis states that allow for free exchange of  
23 GTP and GDP, consistent with McrB not requiring a guanine nucleotide exchange factor. GDP  
24 occupies both sites in our EcMcrBC structure (Figure 5c) while we observe GTP $\gamma$ S in the A/B  
25 site of the TgMcrBC complex (Figure 1c), indicating nucleotide exchange has already occurred.  
26 The final tight E/F site likely adopts a post-hydrolysis state that is partially destabilized but still  
27 remains intact due to the presence of the  $\gamma$ -phosphate. These data suggest that McrC-  
28 stimulated GTP hydrolysis proceeds via a coordinated mechanism that cycles around the McrB  
29 hexamer, engaging each composite active site sequentially (Figure 7). In this scheme, the  
30 release of the  $\gamma$ -phosphate and the intrinsic asymmetry of the complex serve as the driving  
31 forces for a rotational movement. Release of the phosphate would destabilize the E/F interface,  
32 converting it from a tight to a loose configuration. This could promote a transition of the A/B  
33 interface from loose to tight, where exchange of GTP for GDP has presumably occurred.  
34 Weakening the E/F interface would destabilize the interactions with the helical bundle that

1 anchor the finger domain (Figure 3f), thereby releasing McrC and allowing it to rotate. The  
2 asymmetry of the structure would bias the movement in a clockwise direction as the helical  
3 bundle of the finger domain would not be able to associate with the loose F/A interface and thus  
4 would have to intercalate into the D/E interface. This engagement would orient McrC to insert its  
5 catalytic arginine/lysine into the C/D active site, where it could trigger the next hydrolysis event  
6 to power the motor (Figure 7). The extensive contacts formed between the helix-loop-helix tip of  
7 the finger domain and all six subunits of the McrB hexamer (Figure 3e) would ensure that McrC  
8 does not dissociate from the complex following stimulated turnover. The stepwise transition from  
9 one binding interface to the next (Figure 7) is reminiscent of F/V-type ATPases (Forgacs, 2007;  
10 Iwata et al., 2004; Stock et al., 2000; Yasuda et al., 2001). Given the conserved structural  
11 features and asymmetry present in both the Tg and Ec complexes, we anticipate that other  
12 McrBC homologs will follow this mechanochemical model.

13       Efficient hydrolysis also depends on an enzyme's ability to bind and differentiate its  
14 appropriate nucleotide substrate. GTPases use the conserved aspartate in the G4 element to  
15 coordinate substituents at the 1' and 2' positions of the guanine base while AAA+ proteins  
16 recognize the amino group at the 6' position in adenine (Bourne et al., 1991; Scheffzek et al.,  
17 1997). By reading out the 1', 2', and 6' positions of the guanine base, McrB homologs appear to  
18 have combined both strategies to fine-tune their specificity for GTP in the context of a AAA+  
19 fold. Ec and TgMcrB both use the same basic chemistry for this recognition, but each employs  
20 different structural components to mediate these contacts (Figure 5g-h). Interestingly, these  
21 pieces lie outside the core AAA+ fold and localize to either the flexible linker that connects to  
22 EcMcrB's N-terminal DNA-binding domain and or the very start of helix  $\alpha$ 1 in TgMcrB  
23 (Supplementary Data S1 and S2a, colored in gold). Although the motor and cleavage  
24 machineries are conserved among McrB homologs (Figures 3-5), the N-terminal domains and  
25 connecting linkers are highly divergent. Crystallographic studies have shown that EcMcrB uses  
26 the DUF3578 fold to bind methyl-cytosine modifications (Sukackaite et al., 2012; Zagorskaite et  
27 al., 2018), whereas the N-terminal domain of TgMcrB consists of a YTH fold that specifically  
28 targets 6mA-modified DNA (Hosford et al., 2020). The related LlaJI restriction system from  
29 *Helicobacter pylori* binds DNA site-specifically via an N-terminal B3 domain (Hosford and  
30 Chappie, 2018). The subtle distinctions we observe with regard to nucleotide recognition are  
31 therefore significant and provide a blueprint for how divergent homologs can adapt the same  
32 fundamental chemistry to radically different structural contexts. Future structural  
33 characterization will determine if these principles hold true for other McrBC family members.



1 Previous biochemical studies suggest that McrBC's stimulated GTP hydrolysis powers  
2 DNA translocation (Panne et al., 1999; Sutherland et al., 1992). While we do not directly  
3 address how this may occur in this study, our structures impose constraints with regard to the  
4 potential pathway of DNA and the organization of a cleavage-competent McrBC complex. DNA  
5 and RNA typically pass through the central pore of hexameric AAA+ helicases and translocases  
6 driven by ATP hydrolysis (Enemark and Joshua-Tor, 2006; Meagher et al., 2019). Based on  
7 recent cryo-EM reconstructions, a similar mechanism has been proposed for EcMrBC, in which  
8 the McrB N-terminal domains might interact with DNA on the bottom of the hexamer and thread  
9 it into the central channel (Nirwan et al., 2019b). Although we see in our map of full-length  
10 EcMcrBC weak density corresponding to the N-terminal domains near the top of the complex  
11 (Figure S7f), numerous structural observations oppose this potential trajectory. First, McrC  
12 specifically binds in the center of the McrB hexamer, blocking access to this pathway in both the  
13 Tg and Ec complexes. The asymmetric association of the finger domain's helical bundle with the  
14 D/E/F subunits shrinks the pore diameter at the top of the hexamer from ~50 Å to ~15 Å (Figure  
15 S3b) while the loop-helix-loop region completely occludes the pore at the bottom of the hexamer  
16 (Figures 3a, S3e and S5a). Passage through the ring in this state would require both distortion  
17 and/or melting of the DNA duplex to conform to the narrow dimensions of the structure as well  
18 as either a complete displacement or gross conformational reorganization of McrC. Such  
19 changes would uncouple the sequential, coordinated stimulation of GTP hydrolysis suggested  
20 by our structures and yield a translocation mechanism that would use a completely stochastic  
21 catalytic process and would depend on alternating cycles of binding and dissociation for both  
22 McrC and DNA. While we cannot rule out that additional conformational changes occur upon  
23 DNA binding, biochemical characterization of EcMcrBC has shown that DNA binding and GTP  
24 hydrolysis are separate and distinct properties *in vitro* (Gast et al., 1997; Panne et al., 1999;  
25 Pieper et al., 1997; Pieper et al., 1999b). It therefore seems unlikely that DNA binding would  
26 significantly alter the architectural and catalytic interactions that have been conserved across  
27 kingdoms. Second, we resolve clear density decorating the outside edges of the TgMcrB<sup>AAA</sup>  
28 hexamer that we attribute to the TgMcrB N-terminal domains (Figure S7g). The localization of  
29 these domains nearly perpendicular to the pore axis would require DNA, if it were to pass  
30 through the center of the TgMcrBC complex, to bend dramatically, more than has been  
31 observed in any structure to date. Energetically, such a configuration would be extremely  
32 unfavorable (Peters and Maher, 2010). The short seven amino acid linker connecting the N-  
33 terminal domains to the Tg AAA+ domains combined with the structural requirements of  
34 nucleotide selectivity would likely prohibit a large-scale rearrangement of these domains within

1 the restriction complex. Taken together, these findings argue against a mechanism in which  
2 DNA passes through the central channel in the McrB hexamer. We speculate that McrBC  
3 complexes use a novel, yet to be elucidated means to translocate DNA.

4 Both EcMcrBC and TgMcrBC form tetradecameric complexes that are bridged by an  
5 McrC dimer (Figures S4 and S6). Our structural modeling, however, suggests that the  
6 conformation of this McrC dimer is incompatible with DNA binding and cleavage. Superposition  
7 with EndoMS shows that the N-terminal scaffold domain of TgMcrC and the first helix in the  
8 nuclease domain of EcMcrC clash with the modeled DNA substrate (Figures 6d and e, S7d and  
9 e). Modeling with other structurally related homologs produced more extreme clashing between  
10 the two McrB hexamers. It remains to be seen whether DNA binding alone could induce a  
11 cleavage-competent conformation. Interestingly, GTPyS does not support EcMcrBC DNA  
12 cleavage *in vitro* (Panne et al., 1999), consistent with our structural findings here. Moreover,  
13 mutation of Pro203 to valine in EcMcrB significantly reduces both EcMcrC-stimulated GTP  
14 hydrolysis and DNA cleavage of an 'ideal' substrate with R<sup>M</sup>C sites optimally spaced 63 base  
15 pairs apart so as not to require translocation (Panne et al., 1999). This finding raises the  
16 possibility that GTP hydrolysis is also needed for the transient reorganization of the McrC  
17 monomers, and that blocking this activity would lead to a non-productive arrangement. Further  
18 experiments will be needed to fully understand how the McrBC complex cleaves DNA.

19 Modification-dependent restriction systems function as a conserved barrier to lytic phage  
20 infections. In the ongoing arms race between virus and host, phages have evolved inhibitors  
21 against McrBC and GmrSD (Bair and Black, 2007; Dharmalingam and Goldberg, 1976), which  
22 confer the ability to bypass these defense machineries and allow phages to survive under  
23 conditions in which they would normally be restricted. Knowing how these defense systems  
24 work and how they have been naturally subverted is clinically important and will aid in the long-  
25 term development of small-molecule inhibitors that can impair conserved defense systems and  
26 improve the efficacy of phage-based treatments.

27

## 28 **ACKNOWLEDGEMENTS**

29 We are grateful to Mark Ebrahim and Johanna Sotiris for help with grid screening and data  
30 collection at the Evelyn Gruss Lipper Cryo-Electron Microscopy Resource Center at The  
31 Rockefeller University. We thank Drs. Richard Cerione and Holger Sondermann for critical  
32 reading of the manuscript and the Northeastern Collaborative Access Team (NE-CAT) beamline  
33 staff at the Advanced Photon Source (APS) for assistance with remote X-ray data collection. This  
34 work was supported by National Institutes of Health Grant GM120242 (to J.S.C.) and is based

1 upon research conducted at NE-CAT beamlines (24-ID-C and 24-ID-E) under the general user  
2 proposals GUP-51113 and GUP-41829 (PI: J.S.C.). NE-CAT beamlines are funded by the  
3 National Institute of General Medical Sciences from the National Institutes of Health (P30  
4 GM124165). The Pilatus 6M detector on 24-ID-C beam line is funded by a NIH-ORIP HEI grant  
5 (S10 RR029205). This research used resources of the Advanced Photon Source, a U.S.  
6 Department of Energy (DOE) Office of Science User Facility operated for the DOE Office of  
7 Science by Argonne National Laboratory under Contract No. DE-AC02-06CH11357. J.S.C. is a  
8 Meinig Family Investigator in the Life Sciences.

9

#### 10 **Author Contributions**

11 Y.N., H.S., C.J.H., T.W., and J.S.C. designed the study and analysed data. C.J.H. and Y.N. cloned  
12 purified all constructs and carried out biochemical assays. Y.N. and H.S. collected cryo-EM data,  
13 carried out image processing, and built the atomic-resolution cryo-EM models. C.J.H. and Y.N.  
14 collected X-ray diffraction data, determined the X-ray structure, and built the X-ray model. Y.N.,  
15 H.S., T.W., and J.S.C. wrote the manuscript.

16

#### 17 **Competing interests**

18 No competing interests to declare.

19

20

21

22

## 1 REFERENCES

- 2 Bair, C.L., and Black, L.W. (2007). A type IV modification dependent restriction nuclease that  
3 targets glucosylated hydroxymethyl cytosine modified DNAs. *J Mol Biol* 366, 768-778.
- 4 Bos, J.L., Rehmann, H., and Wittinghofer, A. (2007). GEFs and GAPs: critical elements in the  
5 control of small G proteins. *Cell* 129, 865-877.
- 6 Bourne, H.R., Sanders, D.A., and McCormick, F. (1991). The GTPase superfamily: conserved  
7 structure and molecular mechanism. *Nature* 349, 117-127.
- 8 Chappie, J.S., and Dyda, F. (2013). Building a fission machine--structural insights into dynamin  
9 assembly and activation. *J Cell Sci* 126, 2773-2784.
- 10 de la Pena, A.H., Goodall, E.A., Gates, S.N., Lander, G.C., and Martin, A. (2018). Substrate-  
11 engaged 26S proteasome structures reveal mechanisms for ATP-hydrolysis-driven  
12 translocation. *Science* 362.
- 13 Dedrick, R.M., Guerrero-Bustamante, C.A., Garlena, R.A., Russell, D.A., Ford, K., Harris, K.,  
14 Gilmour, K.C., Soothill, J., Jacobs-Sera, D., Schooley, R.T., *et al.* (2019). Engineered  
15 bacteriophages for treatment of a patient with a disseminated drug-resistant *Mycobacterium*  
16 abscessus. *Nat Med* 25, 730-733.
- 17 Dharmalingam, K., and Goldberg, E.B. (1976). Mechanism localisation and control of restriction  
18 cleavage of phage T4 and lambda chromosomes in vivo. *Nature* 260, 406-410.
- 19 Enemark, E.J., and Joshua-Tor, L. (2006). Mechanism of DNA translocation in a replicative  
20 hexameric helicase. *Nature* 442, 270-275.
- 21 Erzberger, J.P., and Berger, J.M. (2006). Evolutionary relationships and structural mechanisms  
22 of AAA+ proteins. *Annu Rev Biophys Biomol Struct* 35, 93-114.
- 23 Forgac, M. (2007). Vacuolar ATPases: rotary proton pumps in physiology and pathophysiology.  
24 *Nature reviews Molecular cell biology* 8, 917-929.
- 25 Gai, D., Zhao, R., Li, D., Finkielstein, C.V., and Chen, X.S. (2004). Mechanisms of  
26 conformational change for a replicative hexameric helicase of SV40 large tumor antigen. *Cell*  
27 119, 47-60.
- 28 Gast, F.U., Brinkmann, T., Pieper, U., Kruger, T., Noyer-Weidner, M., and Pingoud, A. (1997).  
29 The recognition of methylated DNA by the GTP-dependent restriction endonuclease McrBC  
30 resides in the N-terminal domain of McrB. *Biol Chem* 378, 975-982.
- 31 Gates, S.N., Yokom, A.L., Lin, J., Jackrel, M.E., Rizo, A.N., Kendsersky, N.M., Buell, C.E.,  
32 Sweeny, E.A., Mack, K.L., Chuang, E., *et al.* (2017). Ratchet-like polypeptide translocation  
33 mechanism of the AAA+ disaggregase Hsp104. *Science* 357, 273-279.

- 1 Hille, F., Richter, H., Wong, S.P., Bratovic, M., Ressel, S., and Charpentier, E. (2018). The  
2 Biology of CRISPR-Cas: Backward and Forward. *Cell* 172, 1239-1259.
- 3 Holm, L., and Rosenstrom, P. (2010). Dali server: conservation mapping in 3D. *Nucleic Acids*  
4 *Res* 38, W545-549.
- 5 Hosford, C.J., and Chappie, J.S. (2018). The crystal structure of the *Helicobacter pylori* LlaJI.R1  
6 N-terminal domain provides a model for site-specific DNA binding. *J Biol Chem* 293, 11758-  
7 11771.
- 8 Hosford, C.J., Bui, A.Q., and Chappie, J.S. (2020). The structure of the *Thermococcus*  
9 *gammatolerans* McrB N-terminal domain reveals a new mode of substrate recognition and  
10 specificity among McrB homologs. *J Biol Chem* 295, 743-756.
- 11 Iwata, M., Imamura, H., Stambouli, E., Ikeda, C., Tamakoshi, M., Nagata, K., Makyio, H.,  
12 Hankamer, B., Barber, J., Yoshida, M., *et al.* (2004). Crystal structure of a central stalk subunit  
13 C and reversible association/dissociation of vacuole-type ATPase. *Proc Natl Acad Sci U S A*  
14 101, 59-64.
- 15 Iyer, L.M., Leipe, D.D., Koonin, E.V., and Aravind, L. (2004). Evolutionary history and higher  
16 order classification of AAA+ ATPases. *J Struct Biol* 146, 11-31.
- 17 Knizewski, L., Kinch, L.N., Grishin, N.V., Rychlewski, L., and Ginalski, K. (2007). Realm of PD-  
18 (D/E)XK nuclease superfamily revisited: detection of novel families with modified transitive meta  
19 profile searches. *BMC Struct Biol* 7, 40.
- 20 Kortright, K.E., Chan, B.K., Koff, J.L., and Turner, P.E. (2019). Phage Therapy: A Renewed  
21 Approach to Combat Antibiotic-Resistant Bacteria. *Cell Host Microbe* 25, 219-232.
- 22 Kruger, T., Wild, C., and Noyer-Weidner, M. (1995). McrB: a prokaryotic protein specifically  
23 recognizing DNA containing modified cytosine residues. *Embo j* 14, 2661-2669.
- 24 Labrie, S.J., Samson, J.E., and Moineau, S. (2010). Bacteriophage resistance mechanisms. *Nat*  
25 *Rev Microbiol* 8, 317-327.
- 26 Leipe, D.D., Wolf, Y.I., Koonin, E.V., and Aravind, L. (2002). Classification and evolution of P-  
27 loop GTPases and related ATPases. *J Mol Biol* 317, 41-72.
- 28 Luria, S.E., and Human, M.L. (1952). A nonhereditary, host-induced variation of bacterial  
29 viruses. *J Bacteriol* 64, 557-569.
- 30 Meagher, M., Epling, L.B., and Enemark, E.J. (2019). DNA translocation mechanism of the  
31 MCM complex and implications for replication initiation. *Nat Commun* 10, 3117.
- 32 Middleton, C.L., Parker, J.L., Richard, D.J., White, M.F., and Bond, C.S. (2004). Substrate  
33 recognition and catalysis by the Holliday junction resolving enzyme Hje. *Nucleic Acids Research*  
34 32, 5442-5451.

- 1 Miller, J.M., and Enemark, E.J. (2016). Fundamental Characteristics of AAA+ Protein Family  
2 Structure and Function. *Archaea* 2016, 9294307.
- 3 Mishra, A.K., and Lambright, D.G. (2016). Invited review: Small GTPases and their GAPs.  
4 *Biopolymers* 105, 431-448.
- 5 Monroe, N., Han, H., Shen, P.S., Sundquist, W.I., and Hill, C.P. (2017). Structural basis of  
6 protein translocation by the Vps4-Vta1 AAA ATPase. *Elife* 6.
- 7 Nakae, S., Hijikata, A., Tsuji, T., Yonezawa, K., Kouyama, K.I., Mayanagi, K., Ishino, S., Ishino,  
8 Y., and Shirai, T. (2016). Structure of the EndoMS-DNA Complex as Mismatch Restriction  
9 Endonuclease. *Structure* 24, 1960-1971.
- 10 Neuwald, A.F., Aravind, L., Spouge, J.L., and Koonin, E.V. (1999). AAA+: A class of chaperone-  
11 like ATPases associated with the assembly, operation, and disassembly of protein complexes.  
12 *Genome Res* 9, 27-43.
- 13 Nirwan, N., Itoh, Y., Singh, P., Bandyopadhyay, S., Vinothkumar, K.R., Amunts, A., and  
14 Saikrishnan, K. (2019b). Structure-based mechanism for activation of the AAA+ GTPase McrB  
15 by the endonuclease McrC. *Nat Commun* 10, 3058.
- 16 Nirwan, N., Singh, P., Mishra, G.G., Johnson, C.M., Szczelkun, M.D., Inoue, K., Vinothkumar,  
17 K.R., and Saikrishnan, K. (2019a). Hexameric assembly of the AAA+ protein McrB is necessary  
18 for GTPase activity. *Nucleic Acids Res* 47, 868-882.
- 19 O'Driscoll, J., Heiter, D.F., Wilson, G.G., Fitzgerald, G.F., Roberts, R., and van Sinderen, D.  
20 (2006). A genetic dissection of the LlaI restriction cassette reveals insights on a novel  
21 bacteriophage resistance system. *BMC Microbiol* 6, 40.
- 22 O'Sullivan, D.J., Zagula, K., and Klaenhammer, T.R. (1995). In vivo restriction by LlaI is  
23 encoded by three genes, arranged in an operon with *llaIM*, on the conjugative *Lactococcus*  
24 plasmid pTR2030. *J Bacteriol* 177, 134-143.
- 25 Ohshima, H., Matsuoka, S., Asai, K., and Sadaie, Y. (2002). Molecular organization of intrinsic  
26 restriction and modification genes *BsuM* of *Bacillus subtilis* Marburg. *J Bacteriol* 184, 381-389.
- 27 Paduch, M., Jelen, F., and Otlewski, J. (2001). Structure of small G proteins and their  
28 regulators. *Acta Biochim Pol* 48, 829-850.
- 29 Panne, D., Muller, S.A., Wirtz, S., Engel, A., and Bickle, T.A. (2001). The McrBC restriction  
30 endonuclease assembles into a ring structure in the presence of G nucleotides. *Embo j* 20,  
31 3210-3217.
- 32 Panne, D., Raleigh, E.A., and Bickle, T.A. (1999). The McrBC endonuclease translocates DNA  
33 in a reaction dependent on GTP hydrolysis. *J Mol Biol* 290, 49-60.

- 1 Peters, J.P., 3rd, and Maher, L.J. (2010). DNA curvature and flexibility in vitro and in vivo. *Q*  
2 *Rev Biophys* 43, 23-63.
- 3 Perona, J.J., and Martin, A.M. (1997). Conformational transitions and structural deformability of  
4 EcoRV endonuclease revealed by crystallographic analysis. *J Mol Biol* 273, 207-225.
- 5 Pieper, U., Brinkmann, T., Krüger, T., Noyer-Weidner, M., and Pingoud, A. (1997).  
6 Characterization of the interaction between the restriction endonuclease McrBC from *E. coli* and  
7 its cofactor GTP11 Edited by J. Karn. *Journal of Molecular Biology* 272, 190-199.
- 8 Pieper, U., Groll, D.H., Wunsch, S., Gast, F.U., Speck, C., Mucke, N., and Pingoud, A. (2002).  
9 The GTP-dependent restriction enzyme McrBC from *Escherichia coli* forms high-molecular  
10 mass complexes with DNA and produces a cleavage pattern with a characteristic 10-base pair  
11 repeat. *Biochemistry* 41, 5245-5254.
- 12 Pieper, U., and Pingoud, A. (2002). A mutational analysis of the PD...D/EXK motif suggests that  
13 McrC harbors the catalytic center for DNA cleavage by the GTP-dependent restriction enzyme  
14 McrBC from *Escherichia coli*. *Biochemistry* 41, 5236-5244.
- 15 Pieper, U., Schweitzer, T., Groll, D.H., Gast, F.U., and Pingoud, A. (1999a). The GTP-binding  
16 domain of McrB: more than just a variation on a common theme? *J Mol Biol* 292, 547-556.
- 17 Pieper, U., Schweitzer, T., Groll, D.H., and Pingoud, A. (1999b). Defining the location and  
18 function of domains of McrB by deletion mutagenesis. *Biol Chem* 380, 1225-1230.
- 19 Puchades, C., Rampello, A.J., Shin, M., Giuliano, C.J., Wiseman, R.L., Glynn, S.E., and Lander,  
20 G.C.J.S. (2017). Structure of the mitochondrial inner membrane AAA+ protease YME1 gives  
21 insight into substrate processing. *358*, eaao0464.
- 22 Resistance, R.o.A. (2016). Tackling drug-resistant infections globally: final report and  
23 recommendations (Review on antimicrobial resistance).
- 24 Ripstein, Z.A., Huang, R., Augustyniak, R., Kay, L.E., and Rubinstein, J.L. (2017). Structure of a  
25 AAA+ unfoldase in the process of unfolding substrate. *Elife* 6.
- 26 Samson, J.E., Magadan, A.H., Sabri, M., and Moineau, S. (2013). Revenge of the phages:  
27 defeating bacterial defences. *Nat Rev Microbiol* 11, 675-687.
- 28 Scheffzek, K., Ahmadian, M.R., Kabsch, W., Wiesmuller, L., Lautwein, A., Schmitz, F., and  
29 Wittinghofer, A. (1997). The Ras-RasGAP complex: structural basis for GTPase activation and  
30 its loss in oncogenic Ras mutants. *Science* 277, 333-338.
- 31 Schooley, R.T., Biswas, B., Gill, J.J., Hernandez-Morales, A., Lancaster, J., Lessor, L., Barr,  
32 J.J., Reed, S.L., Rohwer, F., Benler, S., *et al.* (2017). Development and Use of Personalized  
33 Bacteriophage-Based Therapeutic Cocktails To Treat a Patient with a Disseminated Resistant  
34 *Acinetobacter baumannii* Infection. *Antimicrob Agents Chemother* 61.

- 1 Scrima, A., Thomas, C., Deaconescu, D., and Wittinghofer, A. (2008). The Rap-RapGAP  
2 complex: GTP hydrolysis without catalytic glutamine and arginine residues. *Embo j* 27, 1145-  
3 1153.
- 4 Snider, J., Thibault, G., and Houry, W.A. (2008). The AAA+ superfamily of functionally diverse  
5 proteins. *Genome Biol* 9, 216.
- 6 Solomon, S.L., and Oliver, K.B. (2014). Antibiotic resistance threats in the United States:  
7 stepping back from the brink. *Am Fam Physician* 89, 938-941.
- 8 Stanley, S.Y., and Maxwell, K.L. (2018). Phage-Encoded Anti-CRISPR Defenses. *Annu Rev*  
9 *Genet* 52, 445-464.
- 10 Stewart, F.J., Panne, D., Bickle, T.A., and Raleigh, E.A. (2000). Methyl-specific DNA binding by  
11 McrBC, a modification-dependent restriction enzyme 11Edited by J. Karn. *Journal of Molecular*  
12 *Biology* 298, 611-622.
- 13 Stock, D., Gibbons, C., Arechaga, I., Leslie, A.G., and Walker, J.E. (2000). The rotary  
14 mechanism of ATP synthase. *Curr Opin Struct Biol* 10, 672-679.
- 15 Sukackaite, R., Grazulis, S., Tamulaitis, G., and Siksnyis, V. (2012). The recognition domain of  
16 the methyl-specific endonuclease McrBC flips out 5-methylcytosine. *Nucleic acids research* 40,  
17 7552-7562.
- 18 Sutherland, E., Coe, L., and Raleigh, E.A. (1992). McrBC: a multisubunit GTP-dependent  
19 restriction endonuclease. *J Mol Biol* 225, 327-348.
- 20 Tesmer, J.J., Berman, D.M., Gilman, A.G., and Sprang, S.R. (1997). Structure of RGS4 bound  
21 to AlF4--activated G(i alpha1): stabilization of the transition state for GTP hydrolysis. *Cell* 89,  
22 251-261.
- 23 Theuretzbacher, U., and Piddock, L.J.V. (2019). Non-traditional Antibacterial Therapeutic  
24 Options and Challenges. *Cell Host Microbe* 26, 61-72.
- 25 Twomey, E.C., Ji, Z., Wales, T.E., Bodnar, N.O., Ficarro, S.B., Marto, J.A., Engen, J.R., and  
26 Rapoport, T.A. (2019). Substrate processing by the Cdc48 ATPase complex is initiated by  
27 ubiquitin unfolding. *Science* 365.
- 28 Vetter, I.R., and Wittinghofer, A. (1999). Nucleoside triphosphate-binding proteins: different  
29 scaffolds to achieve phosphoryl transfer. *Q Rev Biophys* 32, 1-56.
- 30 Weigele, P., and Raleigh, E.A. (2016). Biosynthesis and Function of Modified Bases in Bacteria  
31 and Their Viruses. *Chem Rev* 116, 12655-12687.
- 32 Wendler, P., Ciniawsky, S., Kock, M., and Kube, S. (2012). Structure and function of the AAA+  
33 nucleotide binding pocket. *Biochim Biophys Acta* 1823, 2-14.



- 1 Wittebole, X., De Roock, S., and Opal, S.M. (2014). A historical overview of bacteriophage  
2 therapy as an alternative to antibiotics for the treatment of bacterial pathogens. *Virulence* 5,  
3 226-235.
- 4 Wittinghofer, A. (2016). GTP and ATP hydrolysis in biology. *Biopolymers* 105, 419-421.
- 5 Yang, X., Xu, M., and Yang, S.T. (2016). Restriction modification system analysis and  
6 development of in vivo methylation for the transformation of *Clostridium cellulovorans*. *Appl*  
7 *Microbiol Biotechnol* 100, 2289-2299.
- 8 Yasuda, R., Noji, H., Yoshida, M., Kinosita, K., Jr., and Itoh, H. (2001). Resolution of distinct  
9 rotational substeps by submillisecond kinetic analysis of F1-ATPase. *Nature* 410, 898-904.
- 10 Zagorskaite, E., Manakova, E., and Sasnauskas, G. (2018). Recognition of modified cytosine  
11 variants by the DNA-binding domain of methyl-directed endonuclease McrBC. *FEBS Lett* 592,  
12 3335-3345.
- 13 Zehr, E., Szyk, A., Piszczek, G., Szczesna, E., Zuo, X., and Roll-Mecak, A. (2017). Katanin  
14 spiral and ring structures shed light on power stroke for microtubule severing. *Nat Struct Mol*  
15 *Biol* 24, 717-725.
- 16 Zhao, M., Wu, S., Zhou, Q., Vivona, S., Cipriano, D.J., Cheng, Y., and Brunger, A.T. (2015).  
17 Mechanistic insights into the recycling machine of the SNARE complex. *Nature* 518, 61-67.
- 18
- 19

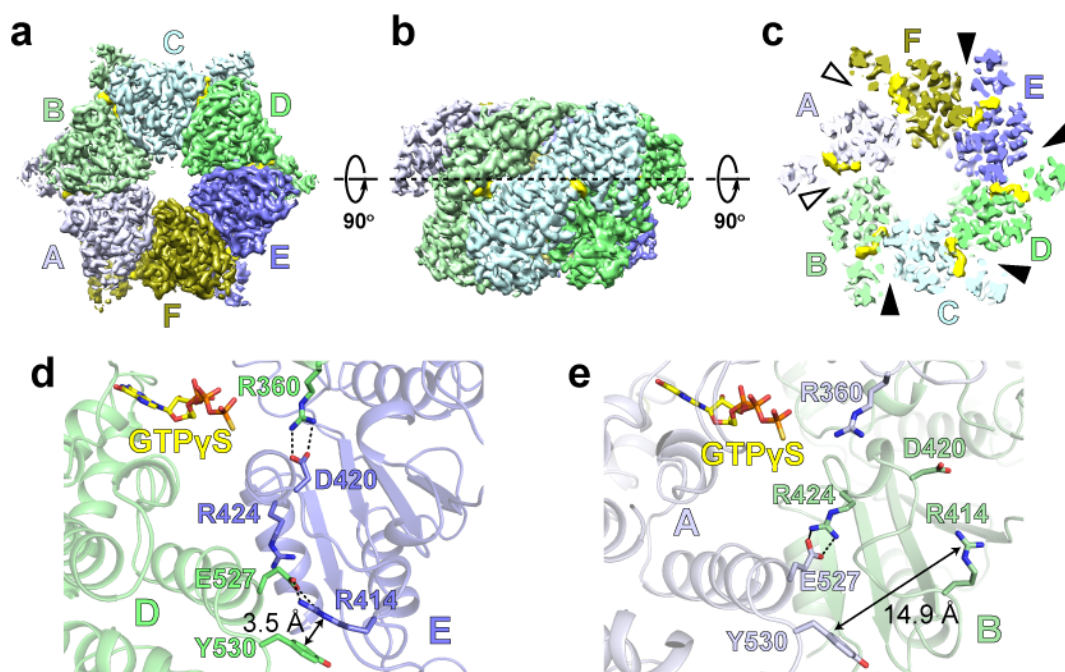

1  
2 **Figure 1. TgMcrB<sup>AAA</sup> forms an asymmetric hexamer.** (a and b) Bottom and side views of the  
3 cryo-EM density map of the TgMcrB<sup>AAA</sup> hexamer. Subunits are colored in shades of blue and  
4 green and nucleotides are shown in yellow. (c) Slice section through the TgMcrB<sup>AAA</sup> hexamer map  
5 at the level of the bound nucleotides, indicated by the dashed line in (b). Solid and empty  
6 arrowheads indicate tight and loose interfaces respectively. (d and e) Close-up views of  
7 interacting residues at the tight D/E interface (d) and the loose A/B interface (e). Dashed lines  
8 indicate hydrogen bonds.  
9

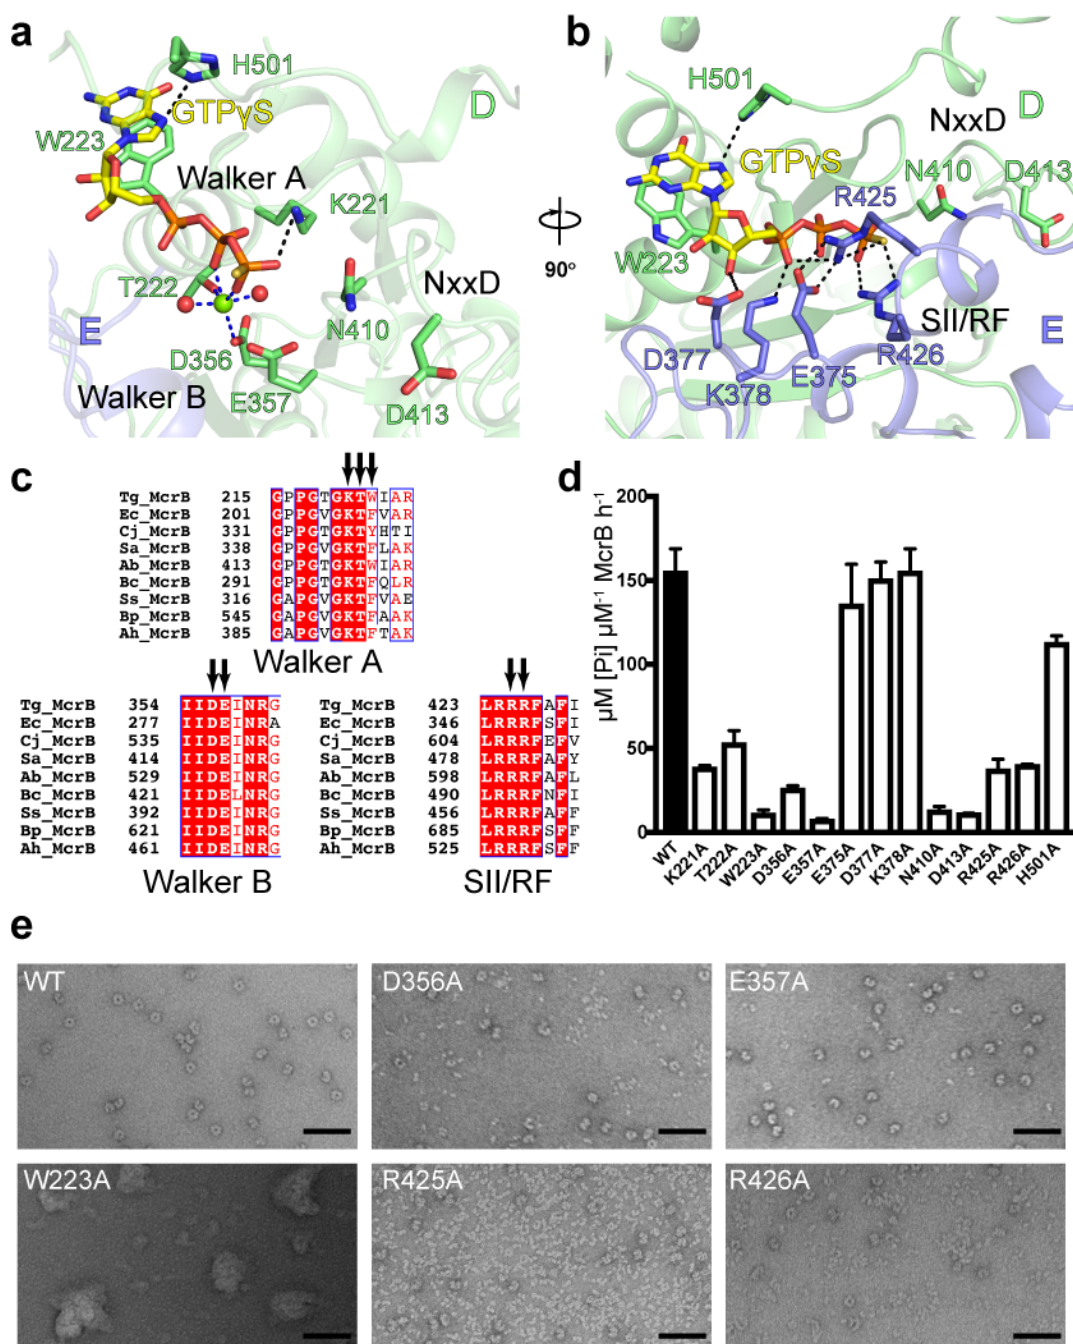

1  
2 **Figure 2. Catalytic residues involved in the basal GTPase activity of TgMcrB.** (a and b)  
3 Close-up views of the GTP-binding site at the tight D/E interface, highlighting residues involved  
4 in *cis* interactions, in particular those of the Walker A and B motifs and the NxxD motif (a), and  
5 residues involved in *trans* interactions, in particular those of the Sensor II/arginine finger (SII/RF)  
6 motif (b). Spheres indicate waters (red) and a magnesium ion (green). Dashed lines indicate  
7 hydrogen bonds (black) and metal coordination (blue). (c) Sequence alignment of McrB homologs

1 for the classic Walker A and B motifs and the SII/RF motif. Arrows indicate the catalytic residues.  
2 Sequence alignment abbreviations are as follows: Tg, *Thermococcus gammatolerans*; Ec,  
3 *Escherichia coli*; Cj, *Campylobacter jejuni*; Sa, *Staphylococcus aureus*; Ab, *Aciduliprofundum*  
4 *boonei*; Bc, *Bacillus cereus*; Ss, *Streptococcus suis*; Bp, *Butyrivibrio proteoclasticus*; Ah,  
5 *Anaerobutyricum hallii*. (d) Basal GTPase activity of wild-type TgMcrB and alanine mutants at the  
6 residues shown in (a) and (b) (n = 3, mean ± standard deviation). (e) Selected micrograph areas  
7 of negatively stained wild-type and mutant TgMcrB<sup>AAA</sup>. Scale bars are 50 nm.  
8

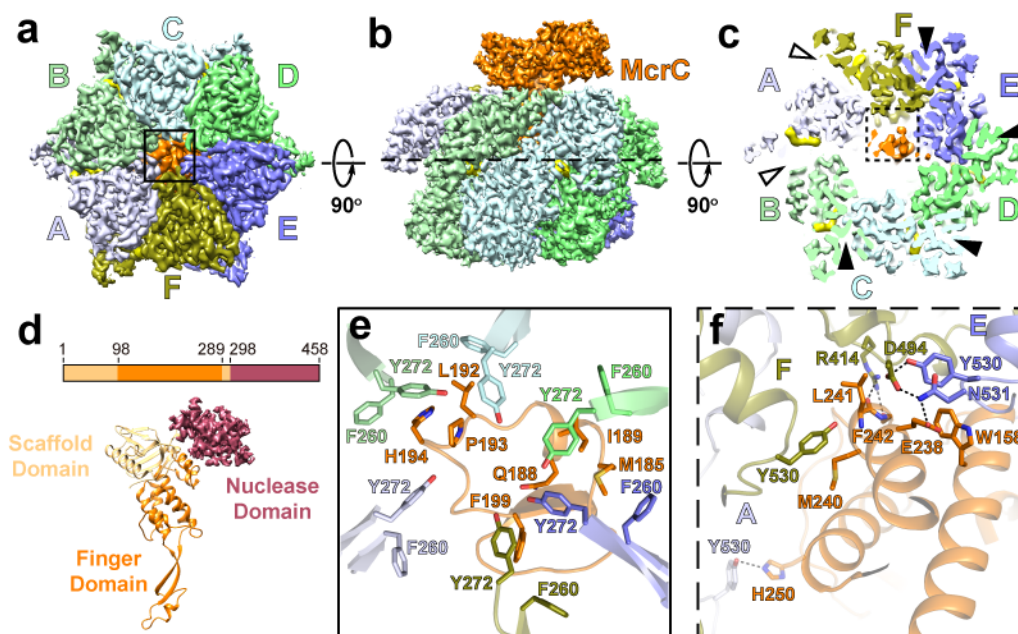

1  
2 **Figure 3. Asymmetric assembly of the TgMcrBC complex.** (a and b) Bottom and side views  
3 of the cryo-EM density map of the TgMcrBC half-complex. TgMcrB subunits are colored as in  
4 Figure 1, TgMcrC is shown in orange, and nucleotides in yellow. (c) Slice section through the map  
5 of the TgMcrBC half-complex at the level of the bound nucleotides, indicated by the dashed line  
6 in (b). Solid and empty arrowheads indicate tight and loose interfaces, respectively. (d) Domain  
7 architecture of TgMcrC. (e) Close-up view of the interactions of TgMcrC with TgMcrB at the bottom  
8 of the hexamer, indicated by the black square in (a). (f) Close-up view of the interactions of  
9 TgMcrC with the TgMcrB hexamer at the E/F and F/A interfaces, indicated by the dashed black  
10 square in (c). Dashed lines indicate hydrogen bonds.  
11

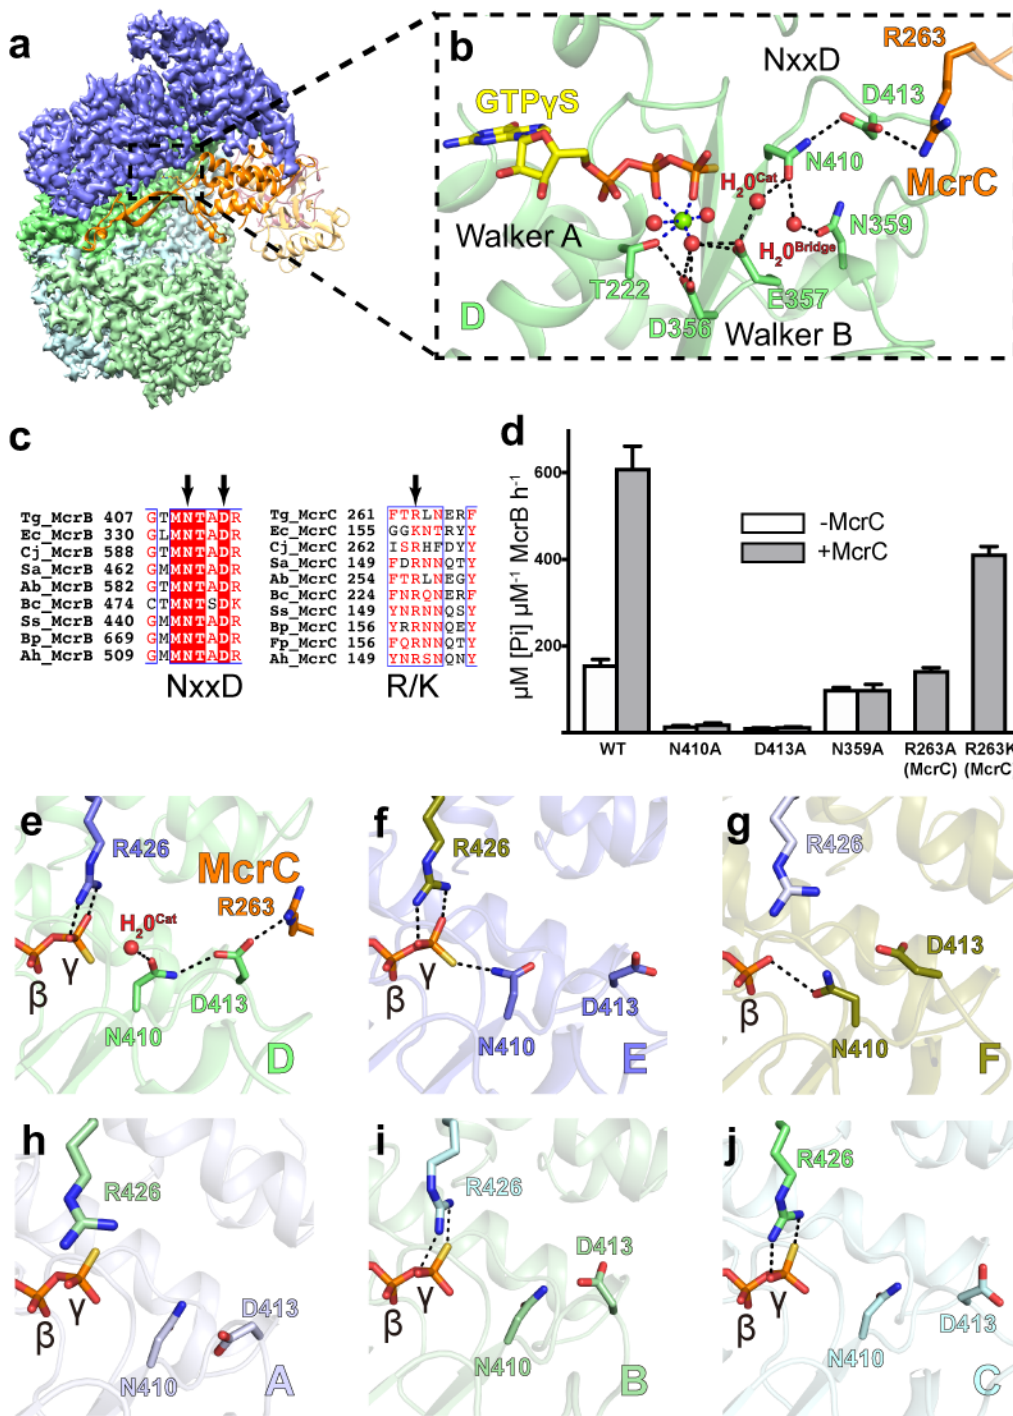

1  
2  
3 **Figure 4. Structural basis for TgMcrC-mediated stimulation of TgMcrB GTPase activity.** (a)  
4 Side view showing the interaction of TgMcrC with the D/E interface of the TgMcrB hexamer.  
5 TgMcrB and TgMcrC are colored as in Figure 3 and shown in surface and ribbon representation,  
6 respectively. For clarity, subunits A and F are not shown. (b) Hydrogen-bonding network formed  
7 by TgMcrC with residues of the NxxD motif at the D/E interface of the TgMcrB hexamer. Spheres

1 indicate waters (red) and a magnesium ion (green). Dashed lines indicate hydrogen bonds (black)  
2 and metal coordination (blue). For clarity, the *trans* interacting residues in subunit E are not  
3 shown. **(c)** Sequence alignment of McrB and McrC homologs for the McrB signature sequence  
4 (NxxD) and the region in McrC that contains the inserted arginine/lysine residue (R/K).  
5 Abbreviations for the aligned species are as in Figure 2c. **(d)** Basal (-McrC) and TgMcrC-  
6 stimulated (+McrC) GTPase activity of TgMcrB for wild-type proteins and mutants with single  
7 amino-acid substitutions either of residues around the NxxD motif in TgMcrB or of residues in  
8 TgMcrC (n = 3, mean  $\pm$  standard deviation). **(e–j)** Arrangement of the asparagine and aspartate  
9 residues of the NxxD motif at the six interfaces in the TgMcrB hexamer of the TgMcrBC complex.  
10

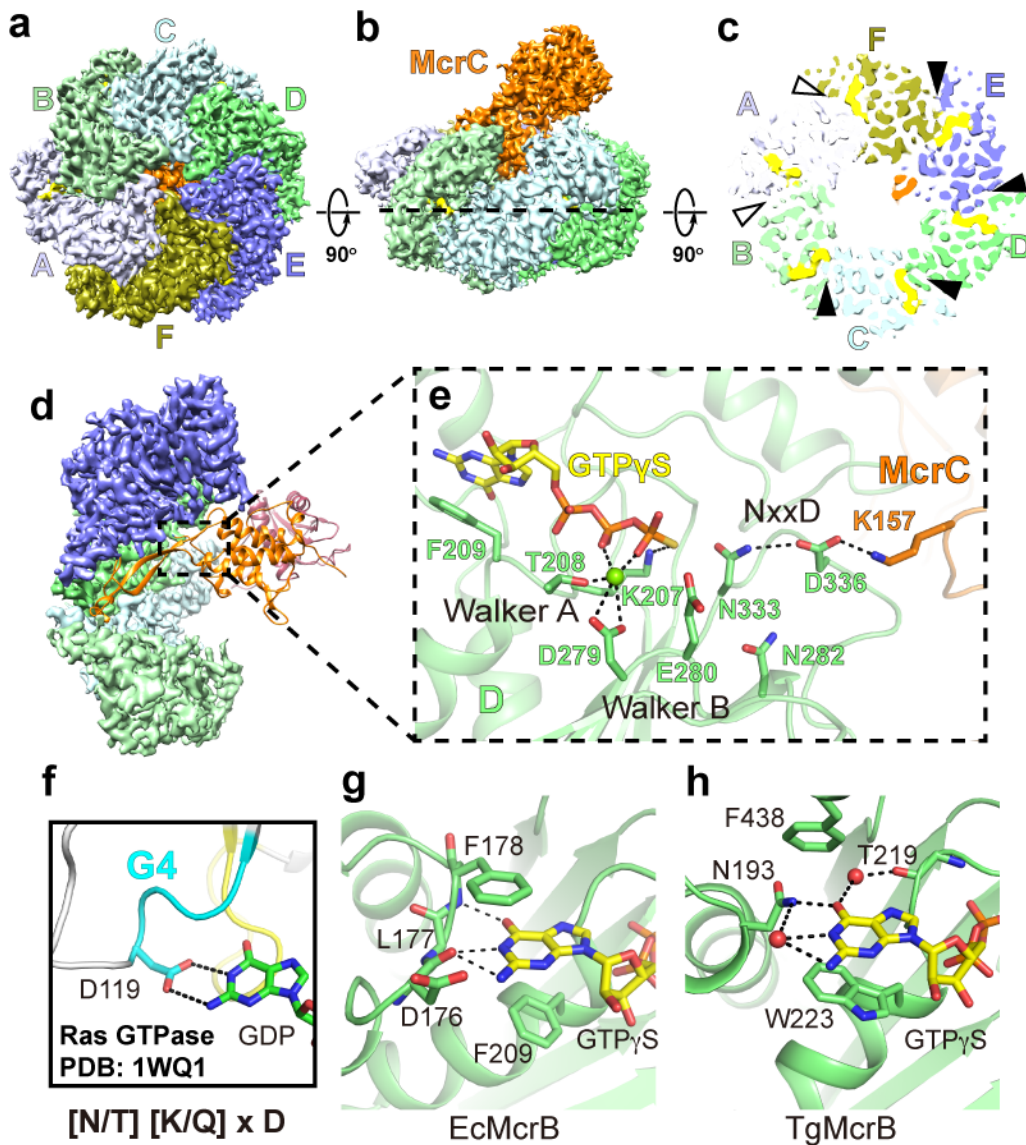

1  
2  
3 **Figure 5. The McrBC complexes of *E. coli* and *T. gammatolerans* show a conserved**  
4 **architecture.** (a and b) Bottom and side views of the cryo-EM density map of the EcMcrBC half-  
5 complex. (c) Slice section through the map of the EcMcrBC half-complex at the level of the bound  
6 nucleotides, indicated by the dashed line in (b). Solid and empty arrowheads indicate tight and  
7 loose interfaces, respectively. (d) Close-up view of the interaction of EcMcrC with the EcMcrB  
8 hexamer at the D/E interface. EcMcrB and EcMcrC are shown in surface and ribbon  
9 representation, respectively. For clarity, subunits A and F are not shown. (e) Hydrogen-bonding  
10 network formed by EcMcrC with residues of the NxxD motif at the D/E interface of the EcMcrB  
11 hexamer. Spheres indicate waters (red) and a magnesium ion (green). Dashed lines indicate  
12 hydrogen bonds and metal coordination. (f-h) Structural basis for guanine recognition in the Ras



- 1 GTPase (PDB: 1WQ1; Scheffzek et al., 1997) and in the McrB homologs (EcMcrB and
- 2 TgMcrB).
- 3

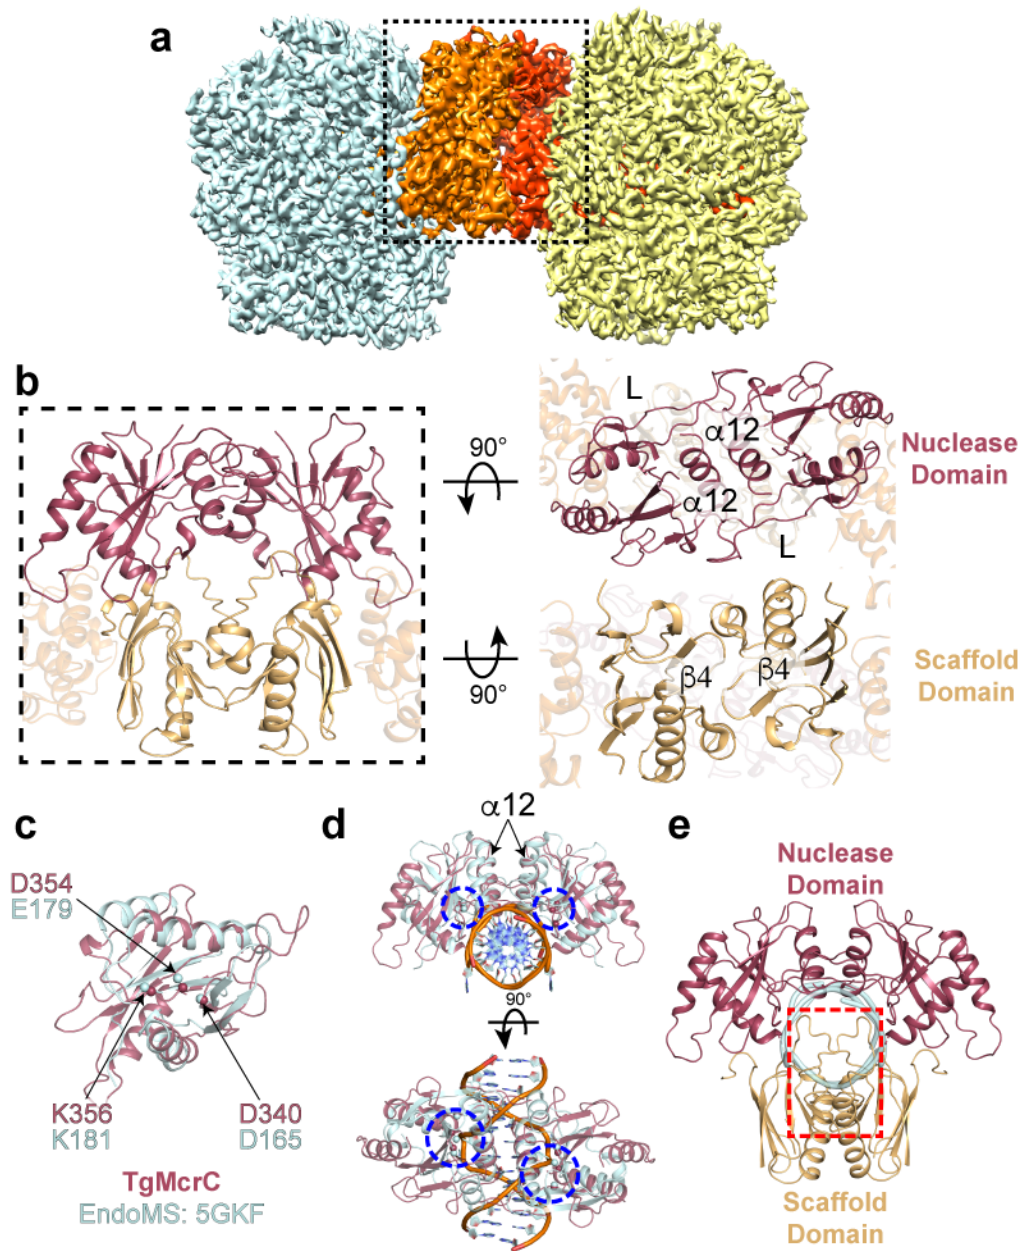

1  
2 **Figure 6. The tetradecameric assembly of the TgMcrB<sup>AAA</sup>C complex shows a cleavage-**  
3 **incompetent conformation.** (a) Composite cryo-EM map of the full TgMcrB<sup>AAA</sup>C complex. Two  
4 TgMcrC (orange and red) form a dimer that bridges two TgMcrB hexamers (cyan and yellow). (b)  
5 Close-up views of the TgMcrC dimer interfaces formed by the two nuclease domains (upper right  
6 panel) and the two N-terminal domains (lower right panel). (c) Superposition of the monomeric  
7 structures of TgMcrC and EndoMS (PDB: 5GKF; Nakae et al., 2016). The conserved residues  
8 involved in the cleavage activity are labeled and shown as spheres. (d) Structural comparison  
9 between the TgMcrC dimer in the TgMcrB<sup>AAA</sup>C complex and the EndoMS dimer in a DNA-bound

1 state. The blue dashed circles indicate the active sites for DNA cleavage. (e) Illustration of the  
2 cleavage-incompetent conformation of TgMcrC. For clarity, the structure of the EndoMS protein  
3 is not shown. The backbone of the DNA substrate bound to EndoMS is colored in cyan. The red  
4 square indicates the regions of potential steric clashes.

5

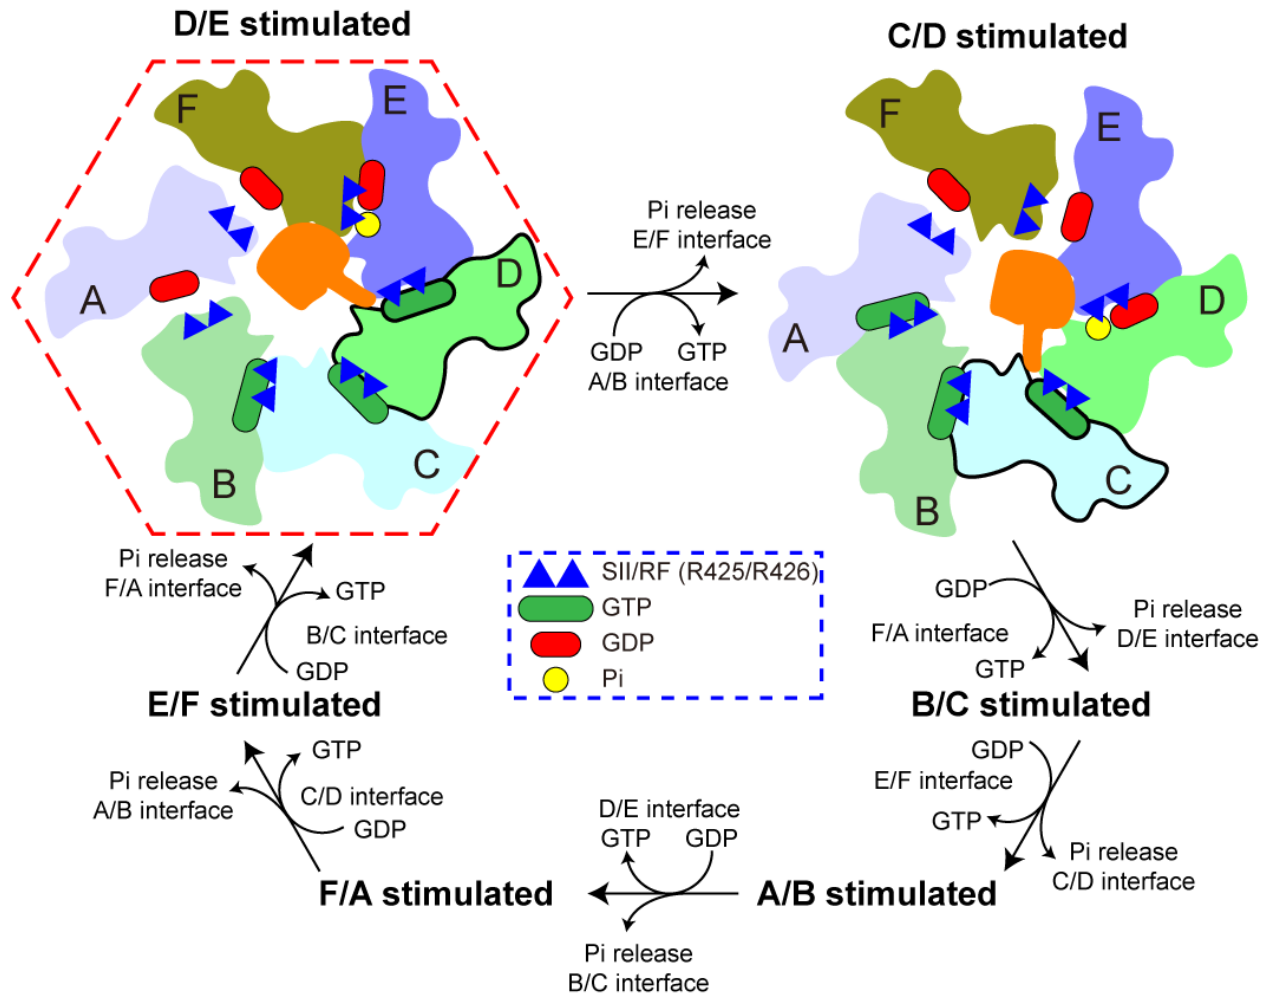

1  
 2 **Figure 7: Rotation model for the catalytic cycle of McrB.** Schematic representation of the  
 3 putative GTP hydrolysis cycle that proceeds sequentially in a clockwise manner around the  
 4 hexameric McrB ring relative to McrC in the central pore. The ‘finger’ extending from McrC  
 5 represents the arginine/lysine residue that interacts with the NxxD motif. Ovals at the interfaces  
 6 of the hexamer represent GTP (green) and GDP (red). The subunits indicated by the thick outlines  
 7 are those in which the NxxD has been reorganized by McrC inserting its arginine/lysine residue.  
 8 The red hexagon indicates the state observed in our cryo-EM structures.  
 9
